# Supplementary material for: Transcriptome-Wide N6-Methyladenosine Methylome Alteration in the Rat Spinal Cord After Acute Traumatic Spinal Cord Injury
Source: Front Neurosci. 2022 May 30;16:848119. doi: 10.3389/fnins.2022.848119 (PMC9189298; doi:10.3389/fnins.2022.848119)
Supplement: Supplementary file 7 [file Table_7.xlsx]

## Sheet: Sheet1
Tble S7. The detailed information of Conjoint Analysis between mRNA expression and m6A methylation
Gene name	osome	peak start	peak end	peak_diff.lg.p	peak different log2(fold change)	expression pvalue	expression log2(fold change)
Cited2	1	12823559	12825117	0.00134896	0.192	0.00193971	0.448512
Ifngr1	1	15071029	15074343	0.0102329	-0.209	7.04183e-19	1.57616
Ifngr1	1	15078999	15080766	0.000380189	0.295	7.04183e-19	1.57616
Map7	1	15700414	15715411	0.0446684	0.209	0.00180272	-0.424385
Map7	1	15736960	15739039	0.00371535	0.157	0.00180272	-0.424385
Map7	1	15739777	15740885	5.49541e-07	0.667	0.00180272	-0.424385
Ahi1	1	16478176	16481085	2.88403e-07	0.331	0.000704949	-0.583069
Hbs1l	1	16863968	16867062	0.00977237	0.448	0.00164691	-0.420051
Lama2	1	19030117	19053607	0.0323594	0.299	0.000143653	1.06267
Eya4	1	23610832	23610982	0.0457088	-1.5	0.0189493	-0.505961
Tpd52l1	1	28576055	28576354	0.0436516	-0.451	0.00863531	-0.530788
Ncoa7	1	29329474	29374471	0.00165959	0.255	5.31636e-05	-0.609546
Sdha	1	31567896	31569556	0.0165959	0.0997	0.014534	-0.333105
Ube2ql1	1	36186946	36187095	0.000851138	0.304	5.44751e-06	-0.922407
Ube2ql1	1	36225096	36226129	0.000645654	0.295	5.44751e-06	-0.922407
Mthfd1l	1	40601192	40612495	0.025704	0.477	0.000122337	-0.632551
Tiam2	1	44432400	44432850	0.00457088	0.494	0.00927797	0.653347
Snx9	1	46815093	46822417	0.00354813	0.217	0.000767535	0.591576
Igf2r	1	48220805	48224931	0.000107152	0.805	0.00203726	0.560953
Igf2r	1	48260841	48263338	6.0256e-06	0.345	0.00203726	0.560953
Qk	1	50983695	51027133	8.31764e-07	1.54	0.000456575	0.709375
Smoc2	1	56373416	56373713	5.49541e-05	0.377	1.41034e-14	1.75862
Fam120b	1	57350837	57357286	0.018197	0.173	0.00374755	-0.468836
Fam120b	1	57383627	57389883	0.0416869	0.353	0.00374755	-0.468836
Chd1	1	57693027	57710143	0.000125893	-1.36	0.0161485	0.441604
Chd1	1	57730585	57739072	0.000588844	0.563	0.0161485	0.441604
Chd1	1	57740043	57744187	0.0151356	0.393	0.0161485	0.441604
Chd1	1	57756362	57756562	0.00331131	-1.32	0.0161485	0.441604
Lix1	1	59156216	59156364	0.0074131	0.691	0.0200273	-0.564432
Pirb	1	63739656	63741141	0.0020893	0.329	1.06094e-07	2.20352
Leng1	1	64128419	64129291	0.0107152	0.564	0.0334378	-0.376374
Leng1	1	64129389	64130867	0.0416869	0.249	0.0334378	-0.376374
Ube2m	1	65537688	65539372	7.94328e-09	0.218	0.0173184	-0.411273
Peg3	1	70229673	70230770	0.0245471	0.163	7.42242e-06	-0.770228
Peg3	1	70231866	70232465	0.000239883	0.298	7.42242e-06	-0.770228
Peg3	1	70232763	70233662	4.57088e-05	0.253	7.42242e-06	-0.770228
Peg3	1	70236103	70236303	0.0363078	0.0343	7.42242e-06	-0.770228
Tnnt1	1	72894954	72896895	0.000812831	0.638	5.31326e-05	1.72913
Cdc42ep5	1	73717453	73717708	0.0380189	0.596	0.00316821	0.680145
Slc8a2	1	78035361	78035612	0.000933254	-0.286	0.00632313	-0.562293
Meis3	1	78068885	78069184	0.0128825	-0.0818	5.39896e-10	0.924837
Meis3	1	78077458	78079698	3.0903e-05	0.373	5.39896e-10	0.924837
Dact3	1	78800851	78808643	0.000549541	0.0741	0.000582833	-0.737799
Dact3	1	78811646	78811795	0.042658	0.296	0.000582833	-0.737799
Dact3	1	78812138	78812336	0.000645654	0.361	0.000582833	-0.737799
Gng8	1	78818857	78820321	0.00707946	0.387	5.12591e-06	-0.733268
Pnmal2	1	78876649	78878779	0	0.256	0.000254533	-0.801827
Pnmal1	1	78893328	78895860	0.040738	0.263	6.75432e-05	-0.805917
Nova2	1	79865447	79865748	0.0323594	0.266	0.0119443	-0.586683
Irgq	1	81398539	81400533	0.000234423	0.208	0.0189426	-0.382537
Irgq	1	81403622	81403822	0.00288403	0.644	0.0189426	-0.382537
Rps19	1	81755202	81756583	0.0281838	-0.0154	7.87086e-09	0.848083
Arhgef1	1	81785768	81786683	0.0346737	0.109	0.00943283	0.416961
Prx	1	84304253	84319855	0.0177828	0.167	0.0371425	-0.572788
Prx	1	84321527	84321776	0.00363078	0.21	0.0371425	-0.572788
Prx	1	84321924	84323417	0.00218776	0.147	0.0371425	-0.572788
Prx	1	84323614	84323963	0.00954993	0.204	0.0371425	-0.572788
Akt2	1	84428577	84441088	0.00301995	0.214	0.000610941	0.504893
Akt2	1	84449827	84450426	0.000549541	0.338	0.000610941	0.504893
Fbl	1	85103567	85107834	0.030903	0.406	0.0438059	0.30407
Fbl	1	85108030	85108179	0.00912011	0.659	0.0438059	0.30407
Sars2	1	86925973	86929135	0.0229087	0.605	0.0113765	-0.500611
Ech1	1	87009797	87010467	0.000251189	0.269	9.57558e-05	0.533969
Polr2i	1	88687337	88687920	0.00190546	4.05	0.0345735	-1.2401
Tyrobp	1	88876843	88879258	0.0141254	0.201	3.94971e-31	2.66209
Cebpa	1	91364481	91364927	2.0893e-06	0.391	1.99146e-21	2.30578
LOC102555672	1	98228377	98229713	0.00467735	0.591	0.0472144	-0.465465
Iglon5	1	98455953	98456153	0.00660693	0.128	3.73314e-05	-0.865457
Shank1	1	100339556	100339756	0.0229087	0.381	1.73745e-05	-0.968847
Shank1	1	100342934	100343730	0.00630957	0.309	1.73745e-05	-0.968847
Lrrc4b	1	100466671	100467070	0.000346737	0.191	0.0300562	-0.402068
Lrrc4b	1	100467269	100468067	3.0903e-05	0.307	0.0300562	-0.402068
Josd2	1	100473670	100474408	0.0120226	0.303	0.0175649	-0.399461
Il4i1	1	100836107	100836703	0.00331131	0.495	1.71057e-07	1.68599
Rpl18	1	101701998	101702342	0.00660693	0.236	0.00107443	0.499222
Lmtk3	1	101783884	101787786	3.46737e-09	0.417	3.67128e-05	-0.858115
Kcnc1	1	102415050	102415200	0.0371535	0.0866	9.61801e-07	-1.04239
Kcnc1	1	102415399	102415600	0.0363078	0.295	9.61801e-07	-1.04239
Kcnc1	1	102455320	102456119	6.30957e-05	0.372	9.61801e-07	-1.04239
Kcnc1	1	102456218	102456618	0.00138038	0.62	9.61801e-07	-1.04239
Nav2	1	104786266	104786915	0.000524807	0.647	0.0171013	0.417514
Slc6a5	1	105286597	105286797	0.0199526	0.0799	2.68041e-09	-1.28789
Slc6a5	1	105331832	105332082	0.0269153	0.24	2.68041e-09	-1.28789
Nell1	1	106218520	106218770	0.0436516	-0.401	0.000239229	-0.63514
Slc17a6	1	107037721	107038269	0.0398107	-0.931	5.65128e-09	-1.09403
Herc2	1	114531137	114537133	0.00281838	-0.452	0.0178247	-0.428855
Herc2	1	114618253	114623588	0.0020893	0.453	0.0178247	-0.428855
Herc2	1	114652937	114653537	0.042658	0.22	0.0178247	-0.428855
Atp10a	1	116113906	116114306	0.00776247	0.436	0.0150675	-0.385784
Atp10a	1	116140593	116141343	8.12831e-06	0.351	0.0150675	-0.385784
Otud7a	1	124652446	124654042	4.0738e-06	0.368	0.00391901	-0.672805
Tm2d3	1	126573521	126586200	0.0251189	-1.2	0.0208645	-0.469867
Chsy1	1	127025593	127069245	3.54813e-06	0.37	2.32284e-11	1.27632
Lysmd4	1	128202409	128203402	0.0042658	0.445	0.00564572	-0.446637
Fam169b	1	129330930	129333048	0.000954993	0.55	0.000113791	1.12107
Akap13	1	137311579	137311829	0.0223872	0.533	9.84457e-09	0.928504
Fanci	1	141172748	141172898	0.0389045	0.385	0.0351329	0.583352
Zfp710	1	141870872	141871223	0.0102329	-0.632	2.37336e-06	0.753144
Zfp710	1	141871572	141871723	0.020893	0.495	2.37336e-06	0.753144
Ngrn	1	142055743	142055991	3.89045e-06	0.404	0.00868708	-0.407413
Vps33b	1	142080560	142082755	0.000109648	0.815	0.00248672	-0.49467
Alpk3	1	142906160	142907105	1.04713e-06	0.407	1.09669e-18	2.6042
Alpk3	1	142907303	142919230	1.07152e-10	0.495	1.09669e-18	2.6042
Alpk3	1	142919478	142919976	0.000316228	0.395	1.09669e-18	2.6042
Adamtsl3	1	144463994	144465795	0.00794328	0.942	6.26202e-08	1.55846
Adamtsl3	1	144518164	144520276	0.00162181	0.373	6.26202e-08	1.55846
Dlg2	1	156787117	156808529	0.00537032	-0.917	4.74204e-07	-0.847008
Dlg2	1	157247338	157269829	0.00128825	-0.335	4.74204e-07	-0.847008
Dlg2	1	157270028	157271029	2.88403e-08	-0.612	4.74204e-07	-0.847008
Dlg2	1	157271877	157272078	0.00363078	-2.16	4.74204e-07	-0.847008
Dlg2	1	157272627	157272878	0.0040738	-0.706	4.74204e-07	-0.847008
Tmem126a	1	156283104	156283305	9.33254e-06	1.22	0.0189276	-0.700016
Rab30	1	157666672	157666823	0.00588844	-2.79	0.0109974	-0.526704
Tenm4	1	161519541	161519692	0.00281838	1.06	0.00218347	-0.506151
Tenm4	1	161880295	161880945	0.0011749	0.399	0.00218347	-0.506151
Tenm4	1	161884743	161884894	0.00281838	0.884	0.00218347	-0.506151
Kctd14	1	162423633	162424273	0.0275423	0.258	1.37193e-05	0.860004
Pak1	1	162882164	162882612	0.000870964	0.0674	2.46729e-05	-0.610007
Lrrc32	1	163454482	163455131	5.7544e-09	0.868	3.04787e-06	1.00419
Pgm2l1	1	165280934	165281335	0.000831764	-1.31	5.62061e-05	-0.850635
Pgm2l1	1	165282683	165282983	0.0229087	-0.501	5.62061e-05	-0.850635
Pgm2l1	1	165284181	165284682	0.0371535	-0.241	5.62061e-05	-0.850635
Pgm2l1	1	165284881	165285082	0.0239883	0.601	5.62061e-05	-0.850635
Pgm2l1	1	165285180	165286031	0.0346737	-0.206	5.62061e-05	-0.850635
Pgm2l1	1	165286429	165286780	0.00144544	-1.43	5.62061e-05	-0.850635
Rab6a	1	165651334	165661970	0.0147911	0.243	0.0110229	-0.377133
Rab6a	1	165662316	165662466	0.0354813	-0.708	0.0110229	-0.377133
Fam168a	1	165876330	165877177	0.000724436	0.269	0.0183716	-0.334572
Fam168a	1	165878371	165879268	0.000512861	0.252	0.0183716	-0.334572
Fchsd2	1	166393917	166394617	0.0141254	-0.418	0.0116972	0.397881
Stard10	1	166457125	166457472	0.00416869	0.241	0.00678061	-0.575069
Arap1	1	166484688	166484839	0.0295121	-0.467	8.61718e-07	0.742474
Arap1	1	166512398	166513103	0.0457088	0.123	8.61718e-07	0.742474
Arap1	1	166514301	166517335	0.000954993	0.21	8.61718e-07	0.742474
Arap1	1	166524900	166525100	0.0380189	0.0796	8.61718e-07	0.742474
Rrm1	1	167553323	167554572	0.0295121	0.225	0.000271213	0.504249
Rrm1	1	167562144	167562441	0.017378	0.298	0.000271213	0.504249
Tub	1	173618611	173622224	0.0199526	0.102	0.000115254	-0.687792
Rpl27a	1	174133510	174135288	0.000562341	0.091	0.000341544	0.528197
Ampd3	1	175629880	175630080	0.00218776	-0.629	0.000450567	0.448949
Tead1	1	177712298	177713048	0.0416869	0.256	0.00440051	0.638915
Tead1	1	177713846	177714046	0.00524807	-2.39	0.00440051	0.638915
Rassf10	1	177766159	177766358	0.0295121	1.03	0.0156946	0.524505
Far1	1	178351673	178364185	0.0354813	0.418	0.0301203	-0.491395
Far1	1	178409504	178410052	0.00512861	-0.406	0.0301203	-0.491395
Far1	1	178410200	178410450	0.0316228	-1.01	0.0301203	-0.491395
Far1	1	178411096	178411296	0.040738	-1.51	0.0301203	-0.491395
Far1	1	178411394	178411545	0.00851138	-2.01	0.0301203	-0.491395
Pde3b	1	184075681	184077273	0.0251189	0.33	0.000630843	0.599967
Ccp110	1	188444045	188444444	0.000316228	-0.868	0.0180531	-0.337688
Lyrm1	1	189679272	189685396	0.00301995	0.431	0.0347026	-0.549031
Eef2k	1	190834590	190839726	0.0301995	0.249	1.588e-05	0.614767
Hs3st2	1	191473052	191474093	0.00758578	-0.34	0.0166811	-0.704158
Ubfd1	1	192027126	192031772	0.025704	0.255	0.00471807	-0.408654
Lcmt1	1	193360114	193369670	0.042658	-0.198	0.0150293	-0.368012
Il4r	1	196963925	196965971	0.000676083	0.199	5.06392e-09	1.02759
Il21r	1	197023287	197023886	0.00380189	0.208	7.41544e-07	1.58658
Apobr	1	197999803	198000397	0.0158489	0.32	1.65536e-07	1.17159
Apobr	1	198002557	198003542	0.00204174	0.297	1.65536e-07	1.17159
Ypel3	1	198211951	198213524	0.0194984	0.157	0.00147886	-0.50095
Fam57b	1	198265155	198265449	0.000154882	0.27	8.12335e-06	-0.930238
Doc2a	1	198287476	198287819	0.0275423	-0.0245	0.000103902	-0.85069
LOC308990	1	198529691	198530539	0.00218776	0.391	9.01991e-06	1.16277
Orai3	1	199221377	199221722	0.00234423	0.477	0.00702876	0.545689
Zfp646	1	199325251	199326151	7.4131e-05	0.497	0.00655447	0.424698
Zfp646	1	199326450	199326700	0.00436516	0.573	0.00655447	0.424698
Inpp5f	1	200108447	200108647	0.0190546	0.866	0.000417803	-0.546975
Inpp5f	1	200114334	200115081	0.00346737	0.208	0.000417803	-0.546975
Tacc2	1	201293684	201294532	0.00338844	0.36	0.00591901	-0.373325
Tacc2	1	201309197	201329263	2.88403e-05	0.42	0.00591901	-0.373325
Zranb1	1	204996694	204998118	0.000295121	0.538	0.0189468	-0.415831
Zranb1	1	204998865	204999265	0.0017378	-1.35	0.0189468	-0.415831
Jakmip3	1	211351566	211383853	0.00190546	0.313	0.00660041	-0.355574
Jakmip3	1	211386049	211402416	0.00281838	0.238	0.00660041	-0.355574
Jakmip3	1	211403122	211403872	0.0363078	0.174	0.00660041	-0.355574
Inpp5a	1	211920694	211920844	0.000269153	0.351	0.0447109	-0.292903
Adgra1	1	212210227	212211023	0.0218776	0.131	0.0178715	-0.500297
Adgra1	1	212211222	212211768	0.000295121	0.61	0.0178715	-0.500297
Adgra1	1	212212164	212212413	0.00234423	-0.993	0.0178715	-0.500297
Brsk2	1	214933446	214933963	0.0057544	0.199	0.000345685	-0.850049
LOC103691267	1	214947465	214947812	0.0269153	0.00854	1.88235e-06	-0.832191
LOC103691267	1	214948009	214948258	0.0346737	0.274	1.88235e-06	-0.832191
LOC103691267	1	214949444	214949594	0.00870964	0.154	1.88235e-06	-0.832191
Lsp1	1	215628798	215629566	0.00676083	0.0607	7.75217e-11	0.963014
Lsp1	1	215652168	215656682	8.51138e-06	0.385	7.75217e-11	0.963014
Lsp1	1	215662257	215662456	0.0398107	-0.341	7.75217e-11	0.963014
Dhcr7	1	217019064	217021536	0.000954993	0.754	0.00146263	-0.578742
Dhcr7	1	217033848	217034295	5.88844e-05	0.38	0.00146263	-0.578742
Mrgprf	1	218475189	218476030	9.77237e-09	0.775	1.25504e-06	1.13915
Chka	1	219121753	219124053	0.000199526	-0.931	0.0318802	-0.322596
Cdk2ap2	1	219346036	219346187	0.000213796	0.56	0.017316	0.348063
Pitpnm1	1	219348721	219351344	0.000223872	0.158	0.00550059	-0.515154
Pitpnm1	1	219351728	219352040	0.0125893	0.0713	0.00550059	-0.515154
Pitpnm1	1	219361796	219361945	0.0154882	0.157	0.00550059	-0.515154
Pc	1	219859131	219859557	0.0275423	0.14	0.0450208	-0.330586
Ltbp3	1	221105536	221106561	0.00138038	0.242	0.00013774	0.606886
Map4k2	1	221712994	221715081	0.00245471	0.331	0.000146237	-0.7236
Map4k2	1	221725381	221725878	0.000501187	0.306	0.000146237	-0.7236
Nrxn2	1	221906848	221907049	0.00245471	0.229	0.00161831	-0.570145
Ppp1r14b	1	222229930	222231609	6.0256e-06	0.0578	2.02546e-08	0.955935
Macrod1	1	222318790	222319631	0.00363078	0.404	0.000616141	-0.681313
Eef1g	1	225164536	225165642	0.0138038	0.121	0.00137321	0.426838
Ahnak	1	225201511	225202212	0.0194984	0.186	2.77754e-05	1.03883
Ahnak	1	225203559	225204159	0.0194984	0.16	2.77754e-05	1.03883
Ahnak	1	225209152	225210052	0.000316228	0.307	2.77754e-05	1.03883
Ahnak	1	225212348	225212599	0.00057544	0.237	2.77754e-05	1.03883
Ahnak	1	225213447	225213748	0.000229087	0.283	2.77754e-05	1.03883
Rab3il1	1	226077328	226079054	0.0138038	0.174	9.25714e-13	1.28308
Syt7	1	226495359	226495560	0.000707946	0.568	9.84652e-05	-0.821312
Ms4a6c	1	227668592	227668842	0.0275423	-0.0934	6.2486e-26	4.0867
Patl1	1	228364713	228367551	0.00537032	-1.04	0.0326356	0.371101
Mpeg1	1	228725094	228725986	0.0288403	0.19	2.59398e-41	3.06489
Mpeg1	1	228726777	228727372	0.00323594	0.291	2.59398e-41	3.06489
Ostf1	1	234782661	234789412	0.00301995	0.297	7.89882e-07	0.692743
Gcnt1	1	236581164	236581761	0.00676083	0.286	8.97911e-08	1.43375
Gcnt1	1	236582057	236582505	0.0190546	0.452	8.97911e-08	1.43375
Apba1	1	241731360	241731709	0.000213796	0.185	0.00255064	-0.700604
Apba1	1	241731907	241762043	5.12861e-05	0.27	0.00255064	-0.700604
Kank1	1	243371496	243373829	0.0194984	0.144	0.0173608	0.316853
Kank1	1	243374326	243376021	1.38038e-10	0.331	0.0173608	0.316853
Kank1	1	243386215	243389797	0.040738	0.236	0.0173608	0.316853
Smarca2	1	244659603	244681523	0.000229087	0.277	0.00416967	-0.378583
Smarca2	1	244718877	244782738	7.76247e-08	0.409	0.00416967	-0.378583
Smarca2	1	244782937	244783088	0.000436516	-1.02	0.00416967	-0.378583
Smarca2	1	244783286	244783686	0.00512861	-0.422	0.00416967	-0.378583
Vldlr	1	245270687	245270988	0.00691831	-1.1	0.00292885	-0.40347
Cdc37l1	1	247136136	247136484	0.0141254	-0.682	0.0373964	-0.311221
Cdc37l1	1	247137574	247138369	0.0380189	-0.208	0.0373964	-0.311221
Jak2	1	247428361	247434319	0.00134896	0.357	2.43439e-05	0.929698
Pten	1	251485326	251487586	0.0190546	-0.296	0.0283893	0.552416
Ifit2	1	252897712	252899097	6.60693e-05	0.324	0.000560099	0.898521
Ifit3	1	252909785	252911079	0.00204174	0.172	1.05244e-05	1.26744
Hhex	1	256104428	256106950	0.0144544	0.336	4.10149e-05	0.891784
Lgi1	1	256996145	256996835	0.000288403	0.438	0.000155269	-0.725463
Marveld1	1	261391090	261392845	0.00912011	0.226	7.92605e-08	1.09625
Zfyve27	1	261435512	261435761	0.00295121	0.333	0.00864675	-0.380702
Cnnm1	1	263240423	263242025	3.63078e-05	0.449	2.08462e-05	-0.803217
Cnnm1	1	263242272	263242522	0.00660693	0.469	2.08462e-05	-0.803217
LOC681458	1	263982477	263982626	0.0123027	-2.13	0.00395245	-0.724979
Scd2	1	264068886	264069286	4.46684e-05	-0.306	0.000264851	-0.510719
Pax2	1	264583328	264583927	0.00234423	0.0906	1.23819e-05	-0.974083
Peo1	1	264756558	264756859	0.0144544	0.636	0.0137818	-0.430423
Peo1	1	264757356	264757706	0.000851138	0.563	0.0137818	-0.430423
Peo1	1	264757904	264758354	0.0338844	0.385	0.0137818	-0.430423
Peo1	1	264762293	264762892	0.00104713	0.522	0.0137818	-0.430423
Btrc	1	265263922	265266373	0.0018197	0.000491	0.000237895	-0.550324
Dpcd	1	265298921	265312009	0.00323594	0.431	0.00178496	-0.566174
Dpcd	1	265312539	265317778	0.00114815	0.192	0.00178496	-0.566174
Fbxl15	1	266077823	266077973	0.0301995	0.574	0.00961601	-0.63474
Wbp1l	1	266358777	266378161	0.000134896	0.0101	0.00109706	0.484557
Wbp1l	1	266412015	266413259	2.88403e-05	0.309	0.00109706	0.484557
As3mt	1	266514029	266514226	0.0436516	-0.526	0.0412688	0.35568
Cnnm2	1	266531667	266629664	0.00204174	0.357	0.00126915	-0.512552
Ina	1	266783776	266792356	2.63027e-05	0.284	2.19374e-05	-0.971738
Pdcd11	1	266889816	266890316	0.0204174	0.269	0.0024276	0.433405
Pdcd11	1	266902968	266904580	0.000436516	0.279	0.0024276	0.433405
Pdcd11	1	266906067	266907144	0.000588844	0.547	0.0024276	0.433405
Slk	1	267389870	267412849	0.0229087	0.105	0.0432954	0.376822
Sorcs3	1	268617623	268618492	0.000794328	-0.964	5.23273e-07	-0.959495
Atrnl1	1	279097636	279097885	0.0138038	0.138	0.00130037	-0.466916
Nanos1	1	282140119	282140370	0.0169824	-1.21	0.0270078	-0.505701
Pcmt1	1	1735206	1735354	0.0275423	-0.524	0.000669004	-0.495881
Tab2	1	2005315	2014035	0.00275423	0.161	0.000749956	0.486062
Stxbp5	1	3861462	3864103	0.00354813	0.371	0.0428632	-0.340956
Stxbp5	1	4011433	4011684	0.00398107	0.59	0.0428632	-0.340956
Rab32	1	4653022	4653220	0.00389045	0.61	1.32121e-21	2.12722
Grm1	1	4756680	4785949	0.00691831	-0.595	6.98698e-07	-1.054
Hebp2	1	13719573	13719822	0.00338844	0.353	0.000264487	-0.791576
Arfgef3	1	13841417	13842415	6.60693e-05	0.377	3.46859e-05	-1.04035
Tnfaip3	1	14402148	14402747	0.0158489	0.378	0.000207247	0.85931
Tnfaip3	1	14405182	14405432	0.0275423	0.458	0.000207247	0.85931
Epb41l2	1	20901228	20905186	0.000501187	0.239	0.00583936	0.416176
Epb41l2	1	20945532	20962530	4.7863e-05	0.384	0.00583936	0.416176
Soga3	1	31040685	31040834	0.0120226	-0.776	0.00841336	-0.399577
Tppp	1	31867850	31868548	0.042658	0.25	0.0118271	-0.444398
Tppp	1	31869045	31869196	0.00162181	0.376	0.0118271	-0.444398
Tppp	1	31869394	31870540	0.0467735	0.132	0.0118271	-0.444398
Tppp	1	31870739	31890168	1.47911e-06	0.2	0.0118271	-0.444398
RGD1308544	1	37702377	37726018	0.0047863	-0.162	0.0300999	-0.704728
Zbtb2	1	40915653	40916246	0.0489779	-0.244	0.0255404	0.487437
Syne1	1	41627420	41635263	0.0389045	0.147	0.000135295	-0.631763
Syne1	1	41710103	41718840	0.0138038	0.271	0.000135295	-0.631763
Rgs17	1	42492800	42493295	0.0457088	-0.64	0.00171538	-0.691563
Ezr	1	47290826	47291774	0.00109648	0.273	6.52631e-21	1.26548
Tagap	1	47494634	47495677	9.12011e-08	0.54	4.1924e-17	2.20266
Sod2	1	47921326	47921587	0.000501187	0.149	0.0312972	-0.391646
Agpat4	1	48718427	48718627	0.0338844	-0.611	0.000993633	-0.465061
Pde10a	1	52360295	52360546	0.00758578	-0.922	0.000715899	-0.716793
Rgmb	1	57795744	57795895	0.00239883	-1.45	0.0342635	-0.276556
Rgmb	1	57809652	57809953	0.00177828	0.36	0.0342635	-0.276556
Usp29	1	69989321	69989471	0.0295121	-1.04	9.71828e-09	-1.08746
Usp29	1	69991666	69993164	1.77828e-05	-0.107	9.71828e-09	-1.08746
Smim17	1	71114668	71115462	1.86209e-05	-1.06	1.10069e-10	-1.23787
Smim17	1	71116006	71116602	0.00288403	-0.8	1.10069e-10	-1.23787
Ssc5d	1	72452147	72452297	0.0363078	-0.556	8.03521e-15	1.70565
Lilrb3	1	73610069	73610320	0.0389045	0.204	1.65147e-22	3.43053
Gltscr2	1	77840711	77841339	0.00891251	0.224	0.00101366	0.449358
Arhgap35	1	78518875	78519375	0.0446684	0.217	0.012719	-0.358276
Vasp	1	80172677	80174715	0.0151356	0.27	2.37209e-05	0.761037
Clasrp	1	80491618	80494171	0.00295121	0.503	0.0195281	-0.392716
Clasrp	1	80494407	80495126	0.00194984	0.262	0.0195281	-0.392716
Clasrp	1	80500725	80501750	1.31826e-05	0.417	0.0195281	-0.392716
Atp1a3	1	81876456	81881416	0.00141254	0.242	4.97349e-07	-1.02359
Grik5	1	81885714	81886063	0.0436516	0.27	0.00811756	-0.4728
Pou2f2	1	81966790	81967040	0.0138038	0.72	4.78373e-09	1.40933
Erf	1	82114279	82114923	0.00017378	0.418	3.48202e-05	0.658364
Hnrnpul1	1	82513886	82516091	0.040738	-0.0056	0.00151107	0.458059
Hnrnpul1	1	82526568	82532308	0.025704	-0.379	0.00151107	0.458059
Hnrnpul1	1	82540589	82546913	5.7544e-08	0.413	0.00151107	0.458059
Axl	1	82556622	82563951	0.00234423	0.222	3.29867e-24	1.61988
Itpkc	1	84039335	84040333	0.0128825	0.186	0.00242757	0.53389
Sptbn4	1	84169043	84172062	0.00562341	0.178	6.8437e-06	-0.980593
Sptbn4	1	84174630	84178653	5.01187e-11	0.365	6.8437e-06	-0.980593
Sptbn4	1	84187111	84205243	1.58489e-06	0.305	6.8437e-06	-0.980593
Sptbn4	1	84215089	84218700	0.00042658	-0.826	6.8437e-06	-0.980593
Map3k10	1	84473424	84473672	0.00977237	0.443	0.00216561	-0.626379
Map3k10	1	84475308	84478357	0.00812831	0.197	0.00216561	-0.626379
Map3k10	1	84480074	84481282	0.0144544	0.28	0.00216561	-0.626379
Map3k10	1	84485842	84490602	0.00109648	0.285	0.00216561	-0.626379
Map3k10	1	84490700	84491096	0.00169824	0.141	0.00216561	-0.626379
Lrfn1	1	85291233	85292275	0.00204174	0.309	0.00265819	-0.646431
Lrfn1	1	85299601	85300345	0.0144544	0.0582	0.00265819	-0.646431
Gmfg	1	85313099	85317900	0.042658	0.198	1.51875e-15	1.71266
Eid2	1	85516147	85516881	0.0147911	0.264	0.00403832	-0.620122
Aplp1	1	88904062	88905317	5.12861e-05	0.19	0.0171337	-0.391081
Cd22	1	89322189	89324893	0.0138038	0.211	4.82544e-17	3.42697
Mag	1	89345917	89346952	1.31826e-05	0.154	0.00139594	-0.479919
Lsr	1	89383613	89384099	0.0165959	0.331	0.00225852	0.51205
Fxyd5	1	89468703	89473575	0.000758578	0.237	3.2233e-20	1.90211
Fxyd7	1	89474650	89474800	0.0354813	0.122	0.00025474	-0.707191
Cebpg	1	91289893	91290093	0.0323594	-0.712	0.000335158	0.688345
Lrp3	1	91449557	91449907	2.75423e-06	0.269	0.00102692	-0.73769
Dpy19l3	1	92007810	92010043	0.0363078	-0.349	0.041627	0.289835
Myh14	1	100616759	100618355	0.00269153	0.45	0.00864191	-0.442714
Myh14	1	100629300	100629652	0.00295121	0.296	0.00864191	-0.442714
Rcn3	1	101077361	101082882	0.00354813	0.134	4.92724e-12	1.2954
Rpl13a	1	101120660	101121309	0.0457088	0.223	0.00200362	0.438699
Bax	1	101456374	101457109	0.00263027	0.0688	0.000529864	0.642188
Ppp1r15a	1	101512890	101513341	0.00194984	0.243	0.0119624	0.405304
Ppp1r15a	1	101513539	101513890	4.16869e-05	0.444	0.0119624	0.405304
Cyth2	1	101796733	101797099	0.00128825	0.122	0.0320175	0.28392
Cyth2	1	101801196	101802127	0.00239883	0.157	0.0320175	0.28392
Kcnj14	1	101808799	101809147	0.00512861	0.628	0.033552	-0.34509
Grin2d	1	101820106	101820606	0.0158489	-0.461	0.000215213	-0.690109
Grin2d	1	101820705	101821006	0.0398107	-0.377	0.000215213	-0.690109
Kcnj11	1	102103588	102103787	0.0389045	0.503	0.00139026	-0.661733
Kcnj11	1	102104678	102105324	1.51356e-05	0.615	0.00139026	-0.661733
Kcnj11	1	102105819	102105968	0.0199526	0.57	0.00139026	-0.661733
Hps5	1	102823537	102823937	0.00020893	0.806	0.00404884	0.553934
Mrgprx3	1	103298270	103298617	0.00162181	0.646	0.000237304	1.17061
Nipa1	1	114385883	114386234	0.000912011	-0.145	0.00421128	-0.460002
Nipa1	1	114387032	114387183	0.00281838	-0.907	0.00421128	-0.460002
Chrna7	1	123901331	123901482	0.00288403	-0.916	1.52186e-05	-0.961465
Mef2a	1	128207764	128208214	0.00645654	-2.25	0.0321376	0.364047
Mef2a	1	128208763	128208963	0.0169824	-2.57	0.0321376	0.364047
Mef2a	1	128211309	128211710	0.0147911	-9.72e-05	0.0321376	0.364047
Arrdc4	1	129767086	129767235	0.0301995	0.598	0.000265075	0.70553
Nr2f2	1	131454471	131460364	0.0245471	0.309	0.000559014	0.651878
Ntrk3	1	139991157	139991506	0.0338844	0.531	0.0129421	-0.406526
Idh2	1	141874648	141875362	1.90546e-06	0.233	0.00150857	0.452273
Furin	1	142186822	142186971	0.00288403	0.389	8.11684e-07	0.747185
Iqgap1	1	142556722	142563020	0.0141254	-0.167	8.99085e-10	1.32055
Rps17	1	143168416	143169005	0.0213796	0.0552	0.00032761	0.604409
Cpeb1	1	143171706	143172406	3.46737e-05	-1.15	0.0116671	-0.406823
Ap3b2	1	143284090	143284289	0.0151356	-0.201	0.00345164	-0.565813
Ap3b2	1	143288074	143289848	0.0288403	0.212	0.00345164	-0.565813
Il16	1	145791174	145793508	0.0162181	0.716	0.000365907	0.716704
Cemip	1	146071515	146071815	0.00616595	0.546	1.00243e-18	2.23205
Cemip	1	146125918	146128780	0.0218776	0.524	1.00243e-18	2.23205
Prss23	1	153733896	153734092	0.0234423	0.175	0.000651982	0.969362
Ccdc81	1	154064278	154073641	0.00186209	0.576	0.00559716	-0.594517
Eed	1	154207507	154215995	0.00074131	0.328	0.000926139	0.565222
Usp35	1	162286272	162286918	0.000162181	0.473	0.00285145	-0.569234
Thrsp	1	162381891	162385427	4.36516e-07	0.397	1.4867e-06	-1.1609
Tsku	1	163318120	163318516	0.0380189	0.317	4.03286e-10	1.46056
Serpinh1	1	164301656	164301806	0.000186209	0.268	7.46185e-15	1.36207
Serpinh1	1	164301954	164302679	0.00346737	0.205	7.46185e-15	1.36207
Slco2b1	1	164671413	164671562	0.00660693	0.478	1.0238e-13	1.27364
P2ry6	1	165973237	165973837	0.000645654	0.327	3.23632e-09	1.7366
P2ry2	1	166031572	166032116	0.000109648	0.667	0.0012884	0.615632
Inppl1	1	166899632	166901149	4.36516e-05	0.00963	0.000432945	0.471801
Trim21	1	167689594	167699263	0.000245471	0.521	0.000541983	0.876883
Trim30	1	169529923	169534697	0.0371535	0.318	5.17471e-06	1.3607
Apbb1	1	170396047	170396871	0.000870964	0.209	0.0046891	-0.461697
Apbb1	1	170403348	170403947	5.24807e-06	0.302	0.0046891	-0.461697
Tpp1	1	170593625	170594159	0.00107152	0.358	8.72989e-13	1.03858
Dchs1	1	170595677	170596424	0.00177828	0.358	0.00146739	0.506008
Dchs1	1	170596573	170596872	0.0104713	0.503	0.00146739	0.506008
Dchs1	1	170600842	170602485	0.00812831	0.424	0.00146739	0.506008
Dchs1	1	170606065	170606514	0.00676083	0.41	0.00146739	0.506008
Nlrp10	1	173522457	173522607	0.000213796	2	2.42328e-06	2.82171
Nlrp10	1	173523304	173523454	0.00234423	0.991	2.42328e-06	2.82171
Ric3	1	173629317	173629718	0.00912011	-0.692	6.17879e-06	-0.753069
Ric3	1	173630066	173630267	0.0436516	0.312	6.17879e-06	-0.753069
Ric3	1	173631415	173631866	0.00107152	-0.601	6.17879e-06	-0.753069
Ric3	1	173631965	173632166	0.00177828	-1.17	6.17879e-06	-0.753069
Ric3	1	173633614	173656310	0.0131826	0.254	6.17879e-06	-0.753069
Nrip3	1	174386758	174387452	0.0457088	0.275	6.95578e-09	-0.921948
Nrip3	1	174387550	174387848	0.000389045	0.212	6.95578e-09	-0.921948
Lyve1	1	175664458	175665205	0.00707946	0.308	4.04584e-05	0.994216
Mrvi1	1	175684704	175691144	0.0446684	-0.283	0.000939993	-0.528355
Dkk3	1	176976017	176982320	0.0131826	0.247	0.000711866	0.56274
Btbd10	1	178138959	178139110	0.042658	-0.638	0.0347062	-0.333838
Btbd10	1	178154671	178168316	0.0467735	0.196	0.0347062	-0.333838
Itpripl2	1	188141002	188141252	0.0011749	0.838	5.44018e-09	1.38702
Itpripl2	1	188141500	188141850	0.00323594	0.576	5.44018e-09	1.38702
Gprc5b	1	188702160	188702360	0.00251189	0.213	0.00361497	-0.467985
Cdr2	1	190890096	190893438	0.0001	0.285	1.31649e-05	-0.722672
Igsf6	1	190997970	190998417	0.0223872	0.456	8.57646e-06	1.52106
Usp31	1	191616188	191616587	0.000134896	-0.828	2.04163e-05	-0.853692
Usp31	1	191616784	191617530	0.00489779	0.415	2.04163e-05	-0.853692
Arhgap17	1	193239234	193239834	0.0138038	0.172	2.28253e-05	0.798211
Hs3st4	1	193834743	193835137	0.0446684	-0.612	1.18394e-05	-1.06989
Hs3st4	1	193835381	194240557	0.00114815	0.483	1.18394e-05	-1.06989
Snrpn	1	195087518	195096311	0.0194984	0.29	0.0177979	-1.62339
Snurf	1	195087511	195096694	0.0162181	0.295	0.000177574	-1.0408
Gtf3c1	1	197034846	197035581	0.00616595	0.361	0.0441703	-0.286173
Gtf3c1	1	197053406	197053946	0.017378	0.315	0.0441703	-0.286173
Coro1a	1	198124028	198124572	0.040738	0.213	3.68086e-10	1.13802
Mvp	1	198425963	198429836	0.000870964	0.209	9.66728e-16	1.24382
Prrt2	1	198453481	198453931	2.23872e-07	0.392	3.28652e-06	-0.886782
Qprt	1	198544945	198545429	0.00891251	-0.068	0.000179172	0.769504
LOC102554302	1	198866244	198868440	0.0057544	0.473	0.00507655	-0.560853
Bcl7c	1	199157802	199159075	0.0047863	0.269	0.0013301	0.552624
Stx1b	1	199255397	199270465	0.00416869	0.143	3.78485e-07	-0.939265
Rgs10	1	199782173	199782420	0.011749	0.314	4.09118e-14	1.18529
Mcmbp	1	200118225	200118572	0.0141254	-0.558	0.000175389	0.582479
Cpxm2	1	204149210	204160940	0.00295121	0.28	3.80143e-11	1.46146
Mki67	1	207998542	207999193	0.0389045	0.123	1.94676e-15	1.84953
Mki67	1	207999892	208000442	5.49541e-06	0.833	1.94676e-15	1.84953
Mki67	1	208003940	208004341	0.000295121	0.759	1.94676e-15	1.84953
Mki67	1	208004989	208007962	0.018197	0.776	1.94676e-15	1.84953
Mki67	1	208008483	208008634	0.00912011	1.07	1.94676e-15	1.84953
Ebf3	1	209636132	209640343	0.0467735	0.5	0.000255918	-0.678725
Stk32c	1	211440581	211440977	0.0338844	0.351	0.00551897	-0.69753
Sirt3	1	213627035	213635526	6.0256e-05	0.298	0.00431056	-0.555067
Hras	1	214178697	214179041	0.0104713	0.0521	0.0298171	-0.349441
Hras	1	214180214	214180655	0.00125893	0.327	0.0298171	-0.349441
Cend1	1	214408560	214410019	0.00199526	1.25	0.00583633	-0.80974
Tollip	1	214826715	214826864	0.00398107	0.384	0.0477762	-0.278559
Ifitm10	1	215521943	215522090	0.0154882	0.322	0.00176312	-0.637347
Igf2	1	215829588	215829738	0.000794328	0.248	5.48386e-14	1.74869
Ccnd1	1	218093498	218093649	0.000467735	0.304	0.000501589	0.493899
Ighmbp2	1	218512758	218513303	0.0295121	0.255	0.00572936	-0.486322
Ndufv1	1	219256710	219258112	0.00676083	0.219	0.0114032	-0.402221
Syt12	1	219690702	219694312	0.000223872	0.609	1.01256e-07	-1.18666
Klc2	1	220494587	220496072	9.33254e-05	0.262	2.75304e-05	-0.807771
Klc2	1	220501428	220502298	7.07946e-05	0.279	2.75304e-05	-0.807771
Sipa1	1	221006652	221007130	0.0040738	0.49	1.76429e-16	1.39593
Ehbp1l1	1	221061977	221062445	0.000223872	0.126	6.14808e-10	1.02212
Ehbp1l1	1	221062625	221066361	0.0301995	0.198	6.14808e-10	1.02212
Ehbp1l1	1	221073595	221073945	0.01	0.371	6.14808e-10	1.02212
Ehbp1l1	1	221075517	221076366	0.000389045	0.315	6.14808e-10	1.02212
Ehbp1l1	1	221076564	221076915	0.000512861	0.558	6.14808e-10	1.02212
Ehbp1l1	1	221077313	221077862	0.00141254	0.458	6.14808e-10	1.02212
Ehbp1l1	1	221084123	221084323	0.030903	0.372	6.14808e-10	1.02212
Frmd8	1	221214352	221214650	0.0416869	0.233	0.000347749	0.529691
Frmd8	1	221233817	221233967	0.000354813	0.672	0.000347749	0.529691
Cdc42ep2	1	221272497	221273594	0.000954993	0.258	8.60347e-05	-0.547141
Ppp2r5b	1	221597932	221598487	0.00104713	0.359	0.0255253	-0.3901
Ccdc88b	1	222105475	222106766	0.000138038	0.589	2.53952e-05	0.845065
Ccdc88b	1	222107898	222114224	7.58578e-05	0.3	2.53952e-05	0.845065
Plcb3	1	222209600	222211595	0.000239883	0.359	0.000949075	0.581412
Fkbp2	1	222232398	222233677	3.89045e-05	0.172	0.0217529	-0.412
Fermt3	1	222254332	222254582	0.0141254	-0.0908	6.29942e-32	2.4221
Rtn3	1	222678698	222681014	1.44544e-06	-0.144	3.02322e-06	-0.598847
Rtn3	1	222707812	222708111	3.46737e-05	0.507	3.02322e-06	-0.598847
Rtn3	1	222708755	222709004	0.00107152	0.373	3.02322e-06	-0.598847
Slc3a2	1	224912414	224912613	0.000169824	0.357	5.34871e-05	0.524474
Fen1	1	226252210	226253104	6.16595e-07	0.367	0.0283145	-0.362038
Dagla	1	226299209	226300008	0.0102329	0.109	0.0109763	-0.445535
Tmem109	1	226925700	226925848	0.0190546	0.292	0.0053487	0.371348
Ms4a6a	1	227931014	227932588	0.0389045	0.454	2.4496e-09	1.91291
Stx3	1	228157536	228163272	0.0074131	0.57	0.0414453	0.384953
Dtx4	1	228745473	228748522	0.0389045	0.0776	2.67602e-07	0.787385
Rfk	1	236494269	236494417	0.042658	-0.981	0.0488427	-0.338785
Prune2	1	236677662	236679262	0.0194984	-0.113	0.0301247	-0.414845
Prune2	1	236721126	236770367	0.000194984	0.365	0.0301247	-0.414845
Prune2	1	236772183	236773634	0.0316228	0.152	0.0301247	-0.414845
Prune2	1	236773833	236775833	0.000870964	0.239	0.0301247	-0.414845
Asah2	1	250557091	250558288	1.09648e-05	-0.995	1.25214e-05	-0.978399
Asah2	1	250559135	250559734	0.00794328	0.0739	1.25214e-05	-0.978399
Cpeb3	1	255660861	255661161	0.042658	-0.769	4.12659e-06	-0.975759
Cpeb3	1	255662106	255662654	0.00446684	-0.616	4.12659e-06	-0.975759
Cpeb3	1	255665043	255665492	0.00186209	-0.516	4.12659e-06	-0.975759
Myof	1	256629220	256635293	0.0151356	0.444	2.9426e-08	1.35831
Sorbs1	1	259374319	259374918	0.00316228	-0.827	1.33029e-08	0.789057
Opalin	1	260324276	260325275	0.0120226	0.14	0.000694209	-0.504277
Opalin	1	260326271	260326422	0.0288403	0.286	0.000694209	-0.504277
Frat2	1	261089349	261089848	0.000239883	0.642	0.0219618	-0.568277
Morn4	1	261323877	261324078	0.047863	0.253	0.0266839	-0.395847
Morn4	1	261325919	261333333	0.0018197	0.205	0.0266839	-0.395847
Sfrp5	1	261442554	261442754	0.0190546	0.327	0.0327096	-0.614811
Dnmbp	1	263678925	263679725	0.00190546	0.564	0.00019018	0.776945
Scd	1	264162699	264162899	0.0020893	0.0531	1.5956e-19	-1.62968
Lbx1	1	264973459	264974139	0.0020893	0.0389	0.0362215	-0.608792
Fbxw4	1	265318624	265318921	0.0234423	0.396	2.04896e-09	0.903627
Ldb1	1	265785680	265785930	0.000275423	0.218	0.0138272	0.38887
Psd	1	266060026	266061040	0.0042658	-0.0509	3.12768e-05	-0.806386
Cuedc2	1	266078204	266078864	0.00177828	0.441	0.000418476	0.664294
Sh3pxd2a	1	267044936	267045585	0.0389045	0.267	8.97611e-05	0.858448
Sh3pxd2a	1	267046232	267049409	1.25893e-05	0.265	8.97611e-05	0.858448
Xpnpep1	1	273708463	273712534	0.00125893	-0.0645	0.0193799	0.347995
Ccdc186	1	277605546	277606295	0.025704	-0.232	0.0247631	-0.365628
Ccdc186	1	277607922	277613684	0.00040738	0.331	0.0247631	-0.365628
Ccdc186	1	277613785	277629129	5.7544e-06	0.272	0.0247631	-0.365628
Afap1l2	1	277731505	277735042	6.0256e-05	0.583	1.75885e-05	0.710889
Hspa12a	1	279948208	279948908	0.00109648	0.284	7.54323e-06	-0.770794
Hspa12a	1	279949657	279950608	0.0151356	0.263	7.54323e-06	-0.770794
Hspa12a	1	279956603	279975912	0.00120226	0.0974	7.54323e-06	-0.770794
Shtn1	1	280171993	280178372	0.0234423	0.332	0.0327245	0.325834
Shtn1	1	280184504	280233823	0.0204174	0.331	0.0327245	0.325834
Pdzd8	1	280459786	280460036	0.0281838	-0.288	0.00583733	-0.428462
Pdzd8	1	280461382	280463627	0.00154882	0.183	0.00583733	-0.428462
Pdzd8	1	280466943	280485658	0.0154882	-1.12	0.00583733	-0.428462
RGD1305733	10	3563089	3564330	0.0138038	0.231	6.93599e-05	-0.709408
Zc3h7a	10	4536199	4538165	0.00912011	1.46	0.0447756	0.430898
Dexi	10	5211466	5211814	0.00512861	0.44	0.000706731	-0.608214
Cdip1	10	10988199	10988448	0.00199526	0.157	0.00267183	-0.421852
Adcy9	10	11511357	11512458	4.57088e-07	0.479	0.0108509	-0.453702
RGD1561157	10	13084401	13084550	0.00194984	0.753	0.00599326	0.593176
Caskin1	10	13869472	13869854	0.00758578	0.291	0.000409516	-0.718913
Caskin1	10	13870252	13871400	2.0893e-07	0.335	0.000409516	-0.718913
Caskin1	10	13872525	13872857	0.0398107	0.143	0.000409516	-0.718913
Clcn7	10	14515541	14515827	0.0446684	0.325	0.0150619	0.324308
Rpusd1	10	15102078	15102277	0.0245471	0.315	0.0180321	-0.472647
Fbxl16	10	15188079	15188679	6.30957e-06	0.458	0.00346514	-0.649943
Rhbdf1	10	15680645	15681280	0.00724436	0.334	0.00038925	0.542357
Sh3pxd2b	10	17283224	17292321	0.020893	0.0753	3.44594e-11	1.11155
Stk10	10	17497964	17520025	0.000616595	0.24	3.33354e-23	1.65857
Gabrb2	10	28192622	28192922	0.00223872	-0.937	0.00619565	-0.749903
Atp10b	10	28861473	28862074	0.011749	-0.595	0.00503905	-0.641802
Havcr2	10	31587705	31588745	0.000331131	0.552	9.55384e-09	1.35617
Trim7	10	34200103	34200402	0.00758578	-0.711	0.043279	-0.4232
Mgat1	10	34519438	34524335	0.00870964	0.348	0.000141935	0.513327
Mgat1	10	34524832	34536217	0.0025704	0.143	0.000141935	0.513327
Mapk9	10	35367405	35372615	0.00234423	0.0958	0.000447602	-0.576733
Adamts2	10	36302426	36302676	0.00630957	0.694	6.05893e-11	1.2732
Adamts2	10	36303570	36303968	0.0131826	0.516	6.05893e-11	1.2732
44447	10	38893307	38894554	0.047863	0.204	0.0146798	-0.34093
44447	10	38905482	38906181	0.0177828	-0.244	0.0146798	-0.34093
44447	10	38906280	38906480	0.0123027	0.491	0.0146798	-0.34093
Kif3a	10	38931201	38935198	0.00524807	0.386	0.000450116	-0.624143
Kif3a	10	38935770	38945325	0.00758578	0.312	0.000450116	-0.624143
Kif3a	10	38952413	38952663	0.00831764	-1.01	0.000450116	-0.624143
Kif3a	10	38953459	38953659	0.00489779	-0.994	0.000450116	-0.624143
Gria1	10	42441722	42441871	0.0281838	0.683	0.000121836	-0.760228
Mfap3	10	42944258	42944999	0.00660693	0.326	0.00633335	0.592381
Galnt10	10	43067413	43146885	0.0047863	0.247	0.000847732	0.513975
Galnt10	10	43193410	43202566	0.0190546	0.29	0.000847732	0.513975
Igtp	10	43637289	43637625	0.0323594	0.321	6.47148e-09	1.14917
Igtp	10	43637722	43638750	0.000141254	0.304	6.47148e-09	1.14917
Sh3bp5l	10	43769633	43779104	0.0301995	0.262	0.0459508	-0.399466
Sh3bp5l	10	43781328	43781727	0.000354813	0.49	0.0459508	-0.399466
Sh3bp5l	10	43782769	43782969	0.0109648	0.0768	0.0459508	-0.399466
Nlrp3	10	45893551	45899197	3.98107e-07	0.866	1.70198e-07	1.42685
Nlrp3	10	45900041	45900589	0.00057544	0.565	1.70198e-07	1.42685
Kcnj12	10	47339910	47341257	0.0331131	0.262	0.00149357	-0.660391
Specc1	10	48418383	48418832	0.0301995	0.259	0.011822	-0.341481
Specc1	10	48419130	48444276	0.0398107	0.173	0.011822	-0.341481
Specc1	10	48522891	48538838	0.042658	0.199	0.011822	-0.341481
Specc1	10	48539136	48539485	0.00446684	0.353	0.011822	-0.341481
Ttc19	10	48599518	48601503	0.00190546	0.225	0.00391555	-0.498268
Ttc19	10	48626679	48627027	2.5704e-06	-0.697	0.00391555	-0.498268
Trim16	10	49240984	49245796	0.0114815	0.529	0.000550288	-0.582323
Pmp22	10	49567842	49568287	0.000524807	0.165	0.0179696	-0.533265
Gas7	10	54240106	54240257	0.00102329	-0.472	6.47789e-09	1.05751
Gas7	10	54240555	54240705	0.0436516	-1.25	6.47789e-09	1.05751
Pik3r5	10	55074156	55075031	0.00812831	0.249	1.92798e-25	2.60897
Myh10	10	55384870	55388646	0.00165959	0.34	0.000404373	-0.611242
Myh10	10	55389659	55393312	5.12861e-06	0.206	0.000404373	-0.611242
Myh10	10	55394123	55395609	5.01187e-06	0.292	0.000404373	-0.611242
Myh10	10	55401623	55404348	4.36516e-05	0.287	0.000404373	-0.611242
Zbtb4	10	56382728	56382928	0.00223872	0.131	0.0241576	-0.346891
Zbtb4	10	56384274	56385119	1.90546e-05	0.275	0.0241576	-0.346891
Zbtb4	10	56385366	56385516	0.0229087	0.0866	0.0241576	-0.346891
Zbtb4	10	56387699	56387849	0.00512861	0.57	0.0241576	-0.346891
Phf23	10	56605127	56605278	0.0436516	-0.118	0.0109005	0.365538
Phf23	10	56608228	56608886	0.000223872	0.35	0.0109005	0.365538
Dlg4	10	56635474	56639715	0.0042658	0.0492	0.00188914	-0.558414
Dlg4	10	56640165	56640436	0.0301995	0.139	0.00188914	-0.558414
Dlg4	10	56651837	56652849	0.00870964	0.258	0.00188914	-0.558414
Asgr1	10	56664357	56665040	0.0371535	0.454	3.74484e-05	0.810831
Wscd1	10	58332584	58332797	0.000194984	0.389	0.0314249	-0.355603
Wscd1	10	58342540	58342790	0.01	0.22	0.0314249	-0.355603
Wscd1	10	58342889	58343090	0.0229087	0.212	0.0314249	-0.355603
Wscd1	10	58370370	58371120	0.000134896	0.246	0.0314249	-0.355603
Wscd1	10	58372017	58372367	0.042658	0.37	0.0314249	-0.355603
Txndc17	10	58778732	58778929	0.0295121	0.248	0.0255587	0.339167
XAF1	10	58872384	58872782	0.0229087	0.0162	3.45633e-08	1.15891
Ube2g1	10	59173267	59173468	0.0074131	0.19	0.0302507	-0.309716
Camkk1	10	59607186	59607386	0.00017378	0.284	6.61285e-06	-0.956427
LOC103693389	10	63552309	63553154	0.00269153	0.267	9.95553e-06	0.890705
LOC103693389	10	63601107	63601356	0.00154882	0.826	9.95553e-06	0.890705
Mrm3	10	64404456	64404953	0.020893	0.319	0.0457752	-0.385317
Spag5	10	65583733	65585673	0.0218776	0.163	3.72426e-06	0.694171
Rab11fip4	10	67038733	67044354	2.04174e-05	0.119	1.96534e-05	-0.748855
Adap2	10	67525263	67527532	0.0269153	0.0472	3.19809e-16	1.41281
Rhbdl3	10	67677048	67677857	0.000398107	0.442	0.0165961	-0.389654
Rhbdl3	10	67731419	67731570	0.0245471	-0.613	0.0165961	-0.389654
Slfn5	10	70298542	70302929	0.0489779	0.349	0.00177988	0.746243
Slfn5	10	70310515	70310865	3.54813e-07	0.766	0.00177988	0.746243
Slfn2	10	70370380	70375037	0.0457088	0.121	3.3725e-17	1.98761
Slfn2	10	70375777	70375976	0.0275423	0.401	3.3725e-17	1.98761
Slfn4	10	70428415	70428913	0.00870964	0.377	1.58906e-05	0.972629
Rasl10b	10	70627394	70629274	0.0245471	0.169	0.0139905	-0.527819
Car4	10	72278381	72279351	0.0186209	0.54	8.76631e-09	-1.12349
Tbx4	10	73362085	73362286	0.0389045	0.738	0.0111959	0.827276
Trim37	10	74471266	74507531	0.0338844	-0.0667	1.67453e-07	-0.810125
Trim37	10	74537733	74538184	0.018197	-0.738	1.67453e-07	-0.810125
44443	10	74882978	74883721	0.0489779	0.135	0.00282119	-0.413599
Tspoap1	10	75070122	75071852	6.0256e-05	0.392	1.05455e-07	-1.12222
Tspoap1	10	75071951	75073047	0.042658	0.442	1.05455e-07	-1.12222
Cuedc1	10	75496060	75496306	0.00616595	0.414	0.0485103	-0.373081
Cuedc1	10	75511712	75516085	0.011749	0.209	0.0485103	-0.373081
Tmem100	10	77541996	77542143	0.00316228	0.349	1.31279e-05	0.729109
Tmem100	10	77542632	77542878	0.0194984	0.261	1.31279e-05	0.729109
Spag9	10	81772447	81775758	0.00794328	0.229	0.0269585	-0.342661
Spag9	10	81784864	81789222	0.00154882	0.309	0.0269585	-0.342661
Col1a1	10	82760661	82761016	0.0102329	0.145	1.17235e-18	1.86495
Phospho1	10	83642714	83643862	0.000295121	0.194	0.00054596	-0.640722
Hoxb8	10	84132701	84133386	0.00977237	0.319	0.000779512	-0.723699
Mllt6	10	85609969	85612990	7.94328e-05	0.0664	0.0248931	-0.302165
Mllt6	10	85624386	85624785	0.0047863	0.389	0.0248931	-0.302165
Rpl19	10	85980065	85981390	8.70964e-06	0.213	0.000299643	0.511501
Thra	10	86669498	86677969	4.0738e-05	0.17	0.041534	-0.324712
Fkbp10	10	88337263	88337461	0.020893	0.358	6.1142e-12	1.46741
Cnp	10	88492419	88492666	0.00912011	0.235	0.0175879	-0.390145
Cnp	10	88494716	88496079	0.00154882	0.112	0.0175879	-0.390145
Atp6v0a1	10	88966399	88966648	0.00851138	-0.0903	0.00701242	-0.394704
Naglu	10	88979412	88979562	0.0354813	-0.532	3.62311e-36	1.8478
Tubg2	10	89074937	89075392	0.00457088	0.0565	0.00154283	-0.766006
Aoc3	10	89251967	89252366	0.00234423	0.494	0.000901124	0.694639
Aoc3	10	89258814	89259213	0.0107152	0.576	0.000901124	0.694639
Rnd2	10	89379552	89380001	0.000630957	0.265	0.000468563	-0.593601
Rundc3a	10	90348261	90348567	0.00977237	0.201	0.00405846	-0.579067
Adam11	10	90748670	90748871	2.5704e-05	0.254	7.8631e-05	-0.901629
Acbd4	10	91189861	91190597	0.0147911	0.26	0.030306	-0.45503
Fmnl1	10	91274809	91275749	0.0338844	0.0211	0.00550982	0.422842
Fmnl1	10	91276745	91277473	0.0398107	0.26	0.00550982	0.422842
Fmnl1	10	91279453	91280411	0.000213796	0.233	0.00550982	0.422842
Mapt	10	92289001	92352611	5.7544e-09	0.306	0.000210666	-0.571941
Mapt	10	92352860	92359204	0.0169824	0.294	0.000210666	-0.571941
Mapt	10	92359303	92364107	8.12831e-09	0.235	0.000210666	-0.571941
Mapt	10	92378698	92383324	4.16869e-07	0.179	0.000210666	-0.571941
Mapt	10	92384171	92384322	0.000446684	-0.451	0.000210666	-0.571941
Mapt	10	92384421	92385020	0.0131826	0.175	0.000210666	-0.571941
Tlk2	10	93415864	93439795	0.0141254	0.405	0.0285043	-0.352973
Tlk2	10	93506279	93506828	0.000295121	0.538	0.0285043	-0.352973
Tanc2	10	93967150	93996494	0.00323594	-0.595	0.0255865	-0.344939
Tanc2	10	94125782	94127080	0.00446684	0.243	0.0255865	-0.344939
Tanc2	10	94131419	94131620	0.00190546	-0.662	0.0255865	-0.344939
Tanc2	10	94131918	94132169	0.0223872	-1.34	0.0255865	-0.344939
Psmd12	10	95706807	95706956	0.0040738	0.273	0.00910624	-0.356424
Gna13	10	97647292	97647437	0.000112202	0.121	0.000661892	0.776363
Amz2	10	97719797	97719997	0.00549541	0.445	0.0410869	-0.31344
Amz2	10	97720594	97720894	0.00724436	0.4	0.0410869	-0.31344
Cdr2l	10	103942366	103944381	0.000549541	0.107	0.00245961	-0.500177
Cdr2l	10	103945633	103946131	0.000251189	0.272	0.00245961	-0.500177
Ubald2	10	105396646	105396946	0.00123027	0.0817	0.00746427	0.418664
Ubald2	10	105397094	105397493	0.0346737	0.14	0.00746427	0.418664
Mfsd11	10	105814414	105814612	0.00891251	0.314	6.85837e-06	0.742175
44448	10	106264880	106329716	4.16869e-06	0.273	0.000290497	0.472991
Birc5	10	106856673	106864126	0.000275423	0.781	0.0259989	0.79129
Pgs1	10	107029659	107030009	0.020893	0.182	0.0434732	-0.301057
Engase	10	107513410	107513610	0.0281838	0.0151	0.0200132	0.387609
Slc26a11	10	108503690	108504138	0.0134896	0.294	0.000988691	0.569229
Rnf213	10	108545247	108547512	6.60693e-05	0.619	1.45648e-08	1.04813
Rnf213	10	108576729	108579284	0.0138038	0.575	1.45648e-08	1.04813
Rnf213	10	108581579	108582228	0.020893	0.286	1.45648e-08	1.04813
Rnf213	10	108624624	108625424	0.00371535	0.313	1.45648e-08	1.04813
Chmp6	10	109073726	109076582	0.000154882	0.0381	0.0426858	0.341205
Chmp6	10	109078471	109078715	0.00645654	0.286	0.0426858	0.341205
Chmp6	10	109079055	109079202	0.0102329	0.373	0.0426858	0.341205
Slc16a3	10	110147561	110148111	0.000301995	0.574	2.43629e-06	1.37505
Narf	10	110463284	110463485	0.0363078	-0.497	0.0255446	-0.329663
Metrnl	10	110898733	110898976	0.018197	0.341	4.86978e-09	1.07882
Shisa9	10	2777823	2778023	0.00645654	-0.805	0.000994747	-0.685877
Shisa9	10	2778270	2778469	0.025704	-1.42	0.000994747	-0.685877
Shisa9	10	2778568	2778817	0.0398107	-0.803	0.000994747	-0.685877
Snx29	10	3840587	3840987	0.040738	0.343	0.000778815	0.508632
Snx29	10	4182415	4186079	0.0057544	-0.634	0.000778815	0.508632
Abat	10	7104270	7107167	0.0371535	0.233	0.00428221	-0.540202
Mettl22	10	7232919	7234406	0.00123027	0.29	0.0384174	-0.390624
Rbfox1	10	8314304	8314802	9.54993e-05	-0.98	1.35779e-05	-0.776442
Sec14l5	10	10590948	10591198	0.0281838	0.353	1.12457e-05	-0.715427
Hmox2	10	10991783	10992128	2.75423e-05	0.307	0.00099302	-0.522674
Vasn	10	11123629	11131548	0.0239883	0.1	0.0112679	0.535888
Zfp263	10	12024523	12029959	0.0316228	0.138	0.0221235	0.436433
Zfp263	10	12030058	12030358	0.00331131	0.562	0.0221235	0.436433
Flywch1	10	13088471	13091450	5.49541e-06	0.259	2.3269e-05	-0.806144
Flywch1	10	13096593	13097159	0.000660693	0.161	2.3269e-05	-0.806144
Pdpk1	10	13447815	13448115	0.00223872	-0.788	0.0181161	-0.361495
Pdpk1	10	13448213	13448513	0.0128825	-1.84	0.0181161	-0.361495
Pdpk1	10	13472706	13473607	0.00588844	-0.689	0.0181161	-0.361495
Ccnf	10	13595427	13595676	0.0151356	0.632	1.73344e-07	1.29564
Rab26	10	13894801	13895327	0.0213796	0.375	0.000217239	-0.741001
Ndufb10	10	14090497	14090811	0.0107152	0.303	0.0252577	-0.331839
Mapk8ip3	10	14263042	14263300	0.00020893	0.125	0.00234534	-0.539902
Mapk8ip3	10	14276351	14276501	3.89045e-05	0.349	0.00234534	-0.539902
Haghl	10	15152735	15153029	0.000446684	0.595	0.0135563	-0.580969
Rab11fip3	10	15350538	15351036	0.000676083	0.388	0.0418141	-0.312083
Rab11fip3	10	15351134	15358940	0.0001	0.298	0.0418141	-0.312083
Rab11fip3	10	15376128	15376278	0.047863	0.084	0.0418141	-0.312083
Rab11fip3	10	15431696	15432044	0.0204174	0.353	0.0418141	-0.312083
Rab11fip3	10	15432142	15432441	0.00457088	0.216	0.0418141	-0.312083
Kcnip1	10	18558127	18558522	9.12011e-06	-0.652	0.000685713	-0.617044
Fbll1	10	20621155	20621306	0.0131826	0.287	0.00421684	-0.694264
Ccng1	10	25905672	25906073	0.00114815	-0.0918	1.20052e-05	0.651043
Gabra1	10	27311116	27311416	0.00301995	-1.19	1.27942e-08	-1.15672
Gabra1	10	27311514	27311765	0.00331131	-1.4	1.27942e-08	-1.15672
Gabra1	10	27312262	27313559	0.0128825	-0.226	1.27942e-08	-1.15672
Nipal4	10	31241739	31242581	0.000131826	0.24	2.97103e-07	-0.70968
Nipal4	10	31242778	31243916	0.00870964	0.314	2.97103e-07	-0.70968
Cyfip2	10	31281027	31283708	0.00030903	0.182	0.000239991	-0.672686
Irgm	10	34214080	34214326	0.0162181	0.511	5.12993e-08	1.10027
Maml1	10	35767598	35768195	0.000707946	0.595	0.00160793	0.543031
Rufy1	10	35888950	35904561	0.000645654	0.235	8.38072e-05	0.582768
Rufy1	10	35927119	35927268	6.30957e-05	0.603	8.38072e-05	0.582768
Sowaha	10	38838238	38838437	0.0169824	0.455	0.00240074	-0.744498
Slc22a5	10	39201694	39202784	0.030903	0.322	0.00434018	0.471731
Lyrm7	10	40183402	40183696	0.00030903	-1.35	0.0023252	-0.659316
Fat2	10	40585993	40586144	0.018197	1.26	2.22295e-07	1.53521
Sparc	10	40749313	40764183	0.000301995	0.274	5.06906e-08	0.725233
Glra1	10	40853446	40853745	0.0147911	0.243	5.40953e-07	-1.26231
Faxdc2	10	43501023	43501174	0.0281838	-1.4	0.00882464	0.527162
Faxdc2	10	43501722	43502022	0.0057544	0.461	0.00882464	0.527162
Gjc2	10	45527388	45527589	0.000912011	0.192	0.00371804	-0.535604
Gjc2	10	45527687	45528487	0.00245471	0.275	0.00371804	-0.535604
Gjc2	10	45528736	45529012	0.0169824	0.234	0.00371804	-0.535604
Snap47	10	45757245	45771949	0.00194984	0.416	0.0159218	-0.442266
Srebf1	10	46578385	46578610	0.000933254	0.157	2.74278e-11	0.998058
Rnf112	10	47719924	47720073	0.000977237	0.654	6.87413e-05	-0.705425
Rnf112	10	47720171	47721026	0.000851138	0.179	6.87413e-05	-0.705425
Map2k4	10	52244591	52270566	0.00107152	0.203	0.000452957	-0.658275
Eif4a1	10	56275196	56275676	0.000263027	0.346	0.00995235	0.332363
Tnfsf12	10	56290876	56291216	0.0102329	-0.461	3.49709e-11	0.998633
Nlgn2	10	56432377	56432527	0.00251189	0.354	0.00086984	-0.54407
Spns2	10	59010477	59010775	0.0131826	0.401	0.0119644	-0.479725
Spns2	10	59012014	59012263	0.0131826	0.325	0.0119644	-0.479725
Gsg2	10	59695901	59696451	0.0239883	0.335	0.00244446	0.931419
Gsg2	10	59697199	59697549	0.0354813	0.487	0.00244446	0.931419
Rap1gap2	10	61179181	61179681	0.0190546	0.313	6.33657e-05	-0.712719
Rap1gap2	10	61232143	61233546	0.0213796	0.449	6.33657e-05	-0.712719
Pafah1b1	10	61458821	61459219	0.00131826	-0.403	0.00940627	-0.414851
Pafah1b1	10	61466048	61466984	0.00562341	0.11	0.00940627	-0.414851
Wdr81	10	62285296	62286094	4.0738e-06	0.554	6.61331e-05	0.608137
Abhd15	10	62644701	62645501	0.00954993	0.305	0.0146089	0.476762
Coro6	10	62692743	62693177	0.00138038	0.442	0.0397384	-0.395598
Ssh2	10	62712750	62713149	0.0436516	0.246	0.000144333	0.707685
Vps53	10	64287729	64290550	0.0446684	0.51	0.0112063	-0.361498
Nxn	10	64412408	64413159	0.0457088	0.0959	1.22168e-06	0.738051
Tmem97	10	65811801	65812200	0.000141254	0.324	0.0139634	-0.433816
Nlk	10	65840398	65840598	0.00616595	-1.67	0.0290511	-0.416606
Omg	10	66845901	66848388	0.00239883	0.168	7.93396e-05	-0.690414
RGD1310429	10	67739029	67739279	0.0147911	-0.657	0.0398802	-0.432509
Asic2	10	68247899	68255743	0.0371535	0.298	2.66616e-05	-0.81983
Rffl	10	70159666	70163944	1e-06	0.238	0.0025416	-0.437892
Rffl	10	70167488	70167739	0.000275423	0.202	0.0025416	-0.437892
Slfn13	10	70326305	70326703	0.025704	0.239	1.69617e-13	2.09022
Slfn13	10	70336323	70337118	4.2658e-05	0.461	1.69617e-13	2.09022
Usp32	10	72300222	72300472	0.040738	-0.585	0.0126957	-0.457449
Usp32	10	72332088	72336336	0.00218776	-0.663	0.0126957	-0.457449
Vmp1	10	73903322	73903570	0.0323594	-0.134	0.0184128	-0.416559
Ppm1e	10	74679358	74679758	0.0138038	0.159	0.000322196	-0.76116
Dynll2	10	75270406	75270554	0.00501187	0.167	2.22133e-05	-0.876914
Dgke	10	76384477	76384975	0.00269153	-0.881	6.94234e-07	-0.910405
Dgke	10	76386666	76388373	0.0151356	0.468	6.94234e-07	-0.910405
Cacna1g	10	82183119	82183468	0.00331131	-0.652	0.000202971	-0.600102
Epn3	10	82227056	82227404	0.0446684	-0.431	0.00188679	-0.77608
Itga3	10	82856138	82856736	0.0074131	0.319	0.000705809	-0.621787
Abi3	10	83644135	83644433	0.0288403	0.462	5.9117e-16	1.60135
Tbkbp1	10	85071057	85071257	0.0109648	0.782	0.00275667	-0.569959
Srcin1	10	85466166	85468939	3.16228e-11	0.227	0.0301315	-0.464621
Srcin1	10	85495204	85495354	0.0194984	0.295	0.0301315	-0.464621
Pip4k2b	10	85657116	85657565	0.011749	0.298	0.00241398	-0.476401
Pip4k2b	10	85657764	85658562	0.0346737	0.165	0.00241398	-0.476401
Pip4k2b	10	85658661	85659011	0.000194984	0.44	0.00241398	-0.476401
Rpl23	10	85721494	85724347	0.00169824	0.226	8.45959e-05	0.528869
Plxdc1	10	85871864	85872063	0.00549541	-1.06	0.00217574	-0.637844
Plxdc1	10	85872161	85874077	0.0104713	0.635	0.00217574	-0.637844
Stac2	10	85993515	85993891	0.00630957	0.0901	0.000961195	-0.555636
Fbxl20	10	86043024	86043623	0.00707946	0.25	0.0227387	-0.325539
Top2a	10	86906837	86909613	3.01995e-05	0.713	1.7136e-13	2.1095
Smarce1	10	87117872	87122044	0.00251189	0.327	0.00248671	0.423741
Smarce1	10	87122143	87138097	8.12831e-06	0.343	0.00248671	0.423741
Hap1	10	88258913	88259063	0.042658	0.258	0.000198701	-0.737779
Acly	10	88419917	88428160	0.0177828	0.234	1.57121e-05	-0.754562
Rab5c	10	88622811	88624628	0.025704	0.129	0.00230192	0.407866
Stat3	10	88796602	88796752	0.00147911	0.3	4.70994e-07	0.692532
Ptrf	10	88862562	88862811	0.00011749	0.276	4.77844e-07	0.791735
Ptrf	10	88862910	88874445	6.30957e-12	0.213	4.77844e-07	0.791735
Mpp3	10	89930469	89930769	0.0128825	-0.577	3.02253e-05	-0.917753
Mpp3	10	89931067	89935813	0.011749	0.286	3.02253e-05	-0.917753
Atxn7l3	10	90236828	90237225	1.90546e-09	0.332	0.00679362	-0.400642
Gfap	10	90991259	90991757	0.0042658	0.236	1.88605e-09	1.01679
Gfap	10	90991856	90992006	0.0169824	0.239	1.88605e-09	1.01679
Gfap	10	90995608	90999087	6.30957e-11	0.268	1.88605e-09	1.01679
Dcakd	10	91096647	91098689	0.0295121	0.0097	0.000583022	0.591644
Map3k14	10	91303626	91304222	0.000186209	0.551	0.00245769	0.624977
Map3k14	10	91324051	91324301	0.030903	0.742	0.00245769	0.624977
Arhgap27	10	91426685	91427356	0.0057544	-0.0432	0.0270345	0.390769
Nsf	10	91916587	91925647	0.00645654	0.0639	3.33257e-06	-0.845179
Nsf	10	91966108	91969484	0.0147911	-0.0115	3.33257e-06	-0.845179
Ftsj3	10	94439157	94442852	0.00057544	0.072	0.0164136	0.372559
Kpna2	10	95200717	95203325	0.00676083	-1.29	1.75929e-09	0.996178
Kpna2	10	95203995	95204306	0.00234423	-0.82	1.75929e-09	0.996178
Pitpnc1	10	95430474	95430624	0.00128825	-1.34	0.00334821	0.448754
Cacng5	10	96123179	96123922	0.00245471	-0.491	0.000474651	-0.807138
Slc16a6	10	97737790	97738089	0.00891251	0.624	1.6338e-07	-0.907948
Abca5	10	98576172	98578107	0.00389045	-0.571	2.24558e-05	-0.939424
Cdc42ep4	10	102245927	102246378	0.00213796	0.187	0.000354287	0.511716
Cdc42ep4	10	102246477	102247837	1.58489e-11	0.331	0.000354287	0.511716
Btbd17	10	103334051	103334399	0.00057544	0.604	0.0272052	-0.536695
Btbd17	10	103335887	103336087	0.0389045	0.44	0.0272052	-0.536695
Fads6	10	103832937	103833087	0.0186209	0.0918	2.55003e-07	-1.07944
Fads6	10	103833336	103833536	0.00794328	0.355	2.55003e-07	-1.07944
Atp5h	10	103967389	103969933	0.0057544	0.301	0.0418353	-0.34617
Nt5c	10	104052855	104053103	0.00177828	-0.429	0.000769633	0.886809
Gga3	10	104137654	104137904	0.00398107	-0.932	0.0256145	-0.324275
Gga3	10	104156028	104156178	0.0457088	-0.848	0.0256145	-0.324275
Foxj1	10	105283382	105283684	0.0436516	0.216	5.72208e-05	0.772153
Rnf157	10	105292637	105292787	0.000891251	0.215	4.56384e-05	-0.86233
Rnf157	10	105293034	105293184	0.00331131	0.449	4.56384e-05	-0.86233
Ube2o	10	105505870	105506021	0.00042658	0.575	5.49151e-05	-0.793457
St6galnac2	10	105650915	105651165	0.0269153	0.535	2.96544e-05	1.45072
Mxra7	10	105744860	105747433	0.0190546	0.548	0.0108031	-0.402109
Mxra7	10	105751401	105771839	0.000218776	0.286	0.0108031	-0.402109
Timp2	10	107339245	107339441	4.7863e-05	0.103	4.24284e-09	0.805305
Timp2	10	107341473	107351514	1.69824e-05	0.19	4.24284e-09	0.805305
Rbfox3	10	107531929	107539498	0.00030903	-0.00907	6.81563e-05	-0.934674
Tbc1d16	10	108258091	108258292	3.98107e-05	0.83	0.0213373	-0.439646
Aatk	10	109190677	109191077	0.00074131	0.249	0.0149373	-0.40697
Aatk	10	109191176	109191675	0.001	0.264	0.0149373	-0.40697
Aatk	10	109192173	109192723	1.34896e-06	0.275	0.0149373	-0.40697
Slc38a10	10	109285401	109285552	0.000870964	0.311	0.00171586	0.441183
Slc38a10	10	109285701	109285951	0.000660693	0.413	0.00171586	0.441183
Pcyt2	10	109788989	109789409	0.0234423	0.21	0.00207837	-0.552233
Sirt7	10	109802505	109802771	0.0436516	0.307	0.0404355	0.3427
Fasn	10	110004515	110005851	0.00169824	0.228	0.00031817	-0.670673
LOC619574	10	110425920	110426071	0.00977237	0.273	0.000115797	0.532788
LOC619574	10	110426369	110426520	0.00128825	0.515	0.000115797	0.532788
Usp25	11	15523043	15538768	0.00831764	-0.0881	0.0288667	0.354088
Chodl	11	17553377	17559369	0.0165959	-0.223	6.09166e-05	-0.901177
Jam2	11	24282145	24282395	0.000169824	-0.953	9.50063e-06	0.582065
Jam2	11	24283786	24283936	0.0158489	-0.295	9.50063e-06	0.582065
Gabpa	11	24322323	24322623	0.0162181	-2.59	0.0275396	0.60277
Bach1	11	27385733	27386782	0.01	0.218	0.0119218	0.579378
Ifnar2	11	31558045	31558741	0.0147911	0.128	3.23205e-05	0.713345
Ifnar2	11	31558939	31559188	0.00288403	-0.58	3.23205e-05	0.713345
Ifnar2	11	31559535	31559685	0.00524807	0.942	3.23205e-05	0.713345
Ifnar1	11	31662113	31662313	0.000107152	0.193	0.00115714	0.454183
Ifngr2	11	31710986	31711282	0.00169824	0.38	5.71292e-07	0.739898
Dopey2	11	33984020	33984970	0.0151356	0.251	0.00706809	-0.430624
Dopey2	11	33985118	33985369	0.0128825	0.276	0.00706809	-0.430624
Ttc3	11	34649558	34653008	0.0218776	-0.631	8.88509e-06	-0.640956
Ttc3	11	34695557	34720498	0.042658	0.19	8.88509e-06	-0.640956
B3galt5	11	36679132	36680777	1e-07	0.396	1.0769e-08	-0.899728
B3galt5	11	36681125	36681524	0.0138038	-0.0157	1.0769e-08	-0.899728
B3galt5	11	36682968	36683118	0.0436516	-0.715	1.0769e-08	-0.899728
B3galt5	11	36683316	36683865	0.00794328	0.325	1.0769e-08	-0.899728
Pcp4	11	36911923	36912073	0.00165959	0.452	0.000526021	-0.839365
Mx2	11	38035482	38037598	0.00524807	0.39	4.0991e-07	1.09503
Mx2	11	38051698	38055187	0.0151356	-0.405	4.0991e-07	1.09503
Col8a1	11	45005414	45005760	0.00186209	0.511	1.27002e-21	2.50822
Nxpe3	11	47188431	47188581	0.0316228	0.321	0.00085801	-0.614363
Nxpe3	11	47233031	47238322	0.000676083	0.309	0.00085801	-0.614363
Alcam	11	50780931	50781130	0.000436516	0.325	0.0273279	0.460653
Plcxd2	11	57247436	57254329	0.0288403	0.551	0.00217686	-0.616384
Plcxd2	11	57259304	57259951	6.0256e-05	-1.25	0.00217686	-0.616384
Boc	11	61152943	61153416	0.00194984	0.462	1.37534e-08	1.21127
Atp6v1a	11	61582993	61583193	0.0354813	-0.869	0.000274208	-0.555547
Arhgap31	11	64708381	64708580	0.000851138	-0.00896	0.00303285	0.568263
Arhgap31	11	64712178	64712675	0.000141254	0.331	0.00303285	0.568263
Arhgap31	11	64712823	64713270	0.000331131	0.37	0.00303285	0.568263
Umps	11	70044394	70044541	0.0251189	-0.335	0.004028	0.442277
Fbxo45	11	71804506	71808709	0.0245471	0.289	4.78663e-05	-0.686426
Fbxo45	11	71810108	71810709	0.000223872	0.461	4.78663e-05	-0.686426
Nrros	11	71888555	71889599	0.0131826	0.122	9.05659e-16	1.83505
Acap2	11	73143913	73144064	0.0190546	-0.535	0.00633626	0.429978
Tmem44	11	73773853	73774149	0.00295121	-0.832	0.0105857	-0.695432
Lrrc15	11	74051631	74051881	0.0138038	0.206	6.3071e-06	3.26084
Fgf12	11	75606359	75606734	0.0489779	0.369	2.76338e-07	-0.845287
Fgf12	11	76169483	76170530	0.0165959	-0.133	2.76338e-07	-0.845287
Bcl6	11	80278177	80278776	0.00134896	-0.951	0.0488388	0.319833
Masp1	11	80785179	80785578	0.00645654	0.415	1.15506e-08	1.20502
Masp1	11	80785677	80785976	0.00851138	0.593	1.15506e-08	1.20502
Masp1	11	80787020	80787270	0.0389045	0.482	1.15506e-08	1.20502
Dgkg	11	82164314	82164564	0.042658	0.641	6.8816e-05	-0.881481
Tmem41a	11	82740541	82740689	7.4131e-05	-1.29	0.0102974	-0.449331
44444	11	86519676	86520140	0.0112202	0.179	0.00558887	-0.53327
Gp1bb	11	86521919	86522169	0.0018197	0.419	0	0
Comt	11	86730792	86731352	7.58578e-05	0.387	3.25599e-16	1.35032
Comt	11	86734994	86735532	0.00104713	0.191	3.25599e-16	1.35032
Tango2	11	86815716	86829566	0.00162181	0.133	0.000104241	-0.685793
Aifm3	11	87375604	87375956	0.00870964	-0.501	2.12904e-06	-0.837214
P2rx6	11	87444873	87445171	0.00977237	0.259	2.35981e-05	-0.944069
Sdf2l1	11	88123932	88124223	0.000162181	0.379	2.98748e-05	0.72887
Dnm1l	11	88858671	88861713	0.0151356	-0.304	0.0151815	-0.430737
Dnm1l	11	88880479	88880778	0.000316228	-1.26	0.0151815	-0.430737
Dnm1l	11	88881872	88882122	0.0467735	0.0117	0.0151815	-0.430737
Cebpd	11	89008551	89008948	0.0158489	0.191	2.33784e-20	2.03635
Robo2	11	11065659	11066807	0.00794328	-0.494	0.0197226	-0.333537
Robo2	11	11516664	11585052	0.0102329	0.548	0.0197226	-0.333537
Adamts1	11	25342416	25342616	0.0380189	-0.793	3.58829e-05	0.884707
Adamts1	11	25342962	25343758	0.00870964	0.274	3.58829e-05	0.884707
Rcan1	11	32541160	32544121	0.025704	0.202	0.000106476	0.559315
Hmgn1	11	36474814	36479584	5.62341e-05	-0.576	0.000891221	0.897763
Dscam	11	37004875	37022894	0.0295121	-0.297	0.00351306	-0.655338
Dscam	11	37056352	37060501	0.0263027	-0.635	0.00351306	-0.655338
Filip1l	11	45057171	45067353	7.94328e-10	0.392	0.00242505	0.883589
Tomm70	11	45480289	45483544	0.00141254	-1.15	0.00717603	-0.491561
Zbtb11	11	47079646	47080044	0.000354813	-1.69	0.00107864	-0.598643
Cblb	11	51040469	51049335	0.000275423	0.536	0.0106127	0.574376
Ccdc80	11	60676606	60678206	0.0147911	0.0612	6.89395e-13	1.55366
B4galt4	11	64558942	64564851	0.0239883	0.368	0.000533053	0.649466
B4galt4	11	64573829	64576342	0.00707946	0.355	0.000533053	0.649466
Fstl1	11	65793077	65797151	0.0301995	0.145	2.20883e-05	0.882401
Hcls1	11	66737800	66757129	1.77828e-08	0.357	1.05533e-13	2.0135
Kpna1	11	67655018	67655169	0.000338844	-1.5	0.012992	-0.38983
Kpna1	11	67655268	67655718	6.60693e-05	-0.97	0.012992	-0.38983
Adcy5	11	68695888	68696387	0.00724436	0.328	0.00870815	-0.476243
Adcy5	11	68716826	68725244	0.0042658	0.0907	0.00870815	-0.476243
Adcy5	11	68842052	68842253	0.018197	0.123	0.00870815	-0.476243
Mylk	11	69014008	69014159	0.0109648	-0.142	0.032744	0.299368
Mylk	11	69038213	69055907	0.0190546	0.397	0.032744	0.299368
Mylk	11	69098650	69099650	0.00025704	0.286	0.032744	0.299368
Osbpl11	11	70789811	70799480	0.00380189	-0.177	1.0463e-07	0.898438
Lmln	11	70898882	70899332	0.00112202	-0.697	0.0104201	-0.523534
Tnk2	11	71349025	71349176	0.000512861	0.352	0.000632791	-0.621119
Tnk2	11	71351388	71351539	0.000154882	0.0191	0.000632791	-0.621119
Tnk2	11	71351988	71352189	0.0301995	0.0865	0.000632791	-0.621119
Tnk2	11	71387719	71388220	0.000138038	0.36	0.000632791	-0.621119
Tfrc	11	71397422	71397671	0.0060256	-1.43	2.46804e-05	-0.816382
Tfrc	11	71398018	71398168	0.0416869	-1.39	2.46804e-05	-0.816382
Tfrc	11	71399756	71400006	0.0218776	-0.791	2.46804e-05	-0.816382
Tfrc	11	71412956	71414813	0.0251189	-0.196	2.46804e-05	-0.816382
Cep19	11	71921811	71922752	0.0398107	0.211	0.0290947	-0.336996
Opa1	11	74717599	74717898	0.0057544	-0.897	0.000391451	-0.499631
Opa1	11	74719237	74719436	0.025704	-1.41	0.000391451	-0.499631
Hrasls	11	75126788	75126937	0.0239883	-1.15	0.001978	-0.91591
Rtp4	11	80639687	80640283	0.00616595	0.344	5.86644e-08	0.954628
Rtp4	11	80643726	80643975	0.0288403	0.219	5.86644e-08	0.954628
Senp2	11	82629566	82629816	0.00707946	0.579	0.000121439	-0.56327
Senp2	11	82629915	82630314	0.0223872	-0.26	0.000121439	-0.56327
Pds5b	12	785931	791552	2.69153e-05	0.237	0.0479531	-0.350233
Pds5b	12	792198	792548	0.0281838	-0.319	0.0479531	-0.350233
Pds5b	12	793145	793444	0.020893	-1.32	0.0479531	-0.350233
B3glct	12	6472984	6473332	0.042658	0.306	0.0250548	0.392052
Slc7a1	12	8104732	8105381	0.0134896	0.398	0.000264048	-0.62453
Slc7a1	12	8108073	8108473	0.0165959	-0.271	0.000264048	-0.62453
Slc7a1	12	8108572	8108922	0.0169824	-1.05	0.000264048	-0.62453
Tmem130	12	11839656	11839854	0.000223872	0.44	1.35421e-05	-0.758259
Tnrc18	12	13862670	13863369	0.000676083	0.293	0.010742	0.390429
Tnrc18	12	13879178	13884202	0.0380189	0.41	0.010742	0.390429
Tnrc18	12	13911247	13911398	0.00301995	0.264	0.010742	0.390429
Card11	12	15700946	15802665	0.0489779	0.294	7.49967e-16	1.58923
Card11	12	15808678	15824480	2.95121e-10	0.545	7.49967e-16	1.58923
Mrm2	12	16402467	16403656	0.00169824	0.55	0.0335321	-0.458484
Cox19	12	17398283	17403205	0.0020893	0.146	0.00240052	-0.478064
Cox19	12	17404653	17404903	0.0125893	0.537	0.00240052	-0.478064
Prkar1b	12	17679827	17679977	0.025704	0.115	0.000119952	-0.773972
Cnpy4	12	19334192	19334476	0.00190546	0.28	0.00028022	0.686293
Cux1	12	23151185	23152563	0.00177828	-0.29	2.5167e-10	0.980003
Cux1	12	23347198	23403072	0.00870964	0.00415	2.5167e-10	0.980003
Cux1	12	23404635	23408740	0.00512861	0.501	2.5167e-10	0.980003
Cux1	12	23408989	23409439	0.025704	0.341	2.5167e-10	0.980003
Cux1	12	23429937	23430088	0.0165959	0.778	2.5167e-10	0.980003
Ywhag	12	23814673	23815661	0.00251189	0.221	1.77451e-05	-0.644623
Pom121	12	24340593	24340744	0.0245471	-0.687	0.00988188	-0.424729
Fzd9	12	24475112	24476246	0.000346737	0.0998	0.0199121	-0.537682
Gusb	12	30214239	30215139	0.0229087	0.154	3.35256e-25	2.12719
Rimbp2	12	31550558	31554683	0.01	-0.144	2.35329e-05	-0.74592
Rimbp2	12	31581336	31581636	0.0125893	0.36	2.35329e-05	-0.74592
Rimbp2	12	31604271	31604571	0.0489779	0.39	2.35329e-05	-0.74592
Scarb1	12	36757758	36760999	0.00977237	0.274	2.39249e-10	1.08765
Ccdc92	12	37236209	37237153	2.29087e-05	0.2	0.000611153	-0.756207
Rilpl2	12	37545066	37545364	0.00275423	0.124	0.000518194	0.504839
Rilpl2	12	37556155	37556354	0.00457088	0.391	0.000518194	0.504839
Pitpnm2	12	37881644	37888971	0.00295121	0.277	0.0379922	-0.389499
Pitpnm2	12	37901068	37901567	0.000371535	0.425	0.0379922	-0.389499
Pitpnm2	12	37902611	37902861	0.00758578	0.602	0.0379922	-0.389499
Vps37b	12	38020371	38021681	0.000524807	0.45	0.00258002	0.472541
Gpr81	12	38145991	38146136	0.00912011	0.869	0.000155545	1.35885
Rhof	12	38893257	38893898	0.0154882	0.256	0.000309822	-0.685757
Kdm2b	12	39149705	39150169	0.0154882	-0.375	0.00898283	0.425365
Kdm2b	12	39151104	39151502	0.00549541	0.239	0.00898283	0.425365
Atp2a2	12	39554249	39583870	0.00537032	0.163	0.0028712	-0.444594
Atp2a2	12	39587229	39587379	0.00234423	0.0864	0.0028712	-0.444594
Atp2a2	12	39602731	39602880	0.00263027	-0.337	0.0028712	-0.444594
Cux2	12	40209776	40210026	0.0436516	-0.438	0.0138115	-0.449386
Aldh2	12	40493175	40493325	0.0251189	0.142	1.13317e-05	0.634413
Aldh2	12	40498413	40498614	0.0134896	0.26	1.13317e-05	0.634413
Erp29	12	40625337	40625834	2.34423e-05	0.372	0.000572934	0.675495
Rph3a	12	41073714	41073914	0.025704	0.149	1.74025e-06	-1.00658
Rph3a	12	41129018	41130892	0.0017378	0.194	1.74025e-06	-1.00658
Rph3a	12	41140017	41143986	0.000389045	0.158	1.74025e-06	-1.00658
Dtx1	12	41415087	41415436	0.042658	-0.182	0.00511013	-0.528557
Rita1	12	41485462	41488248	8.51138e-06	0.263	0.00392036	-0.595405
Rnft2	12	44008338	44008636	0.000776247	0.347	2.37746e-05	-0.772787
Hspb8	12	45905370	45905519	0.00446684	0.41	0.00239109	0.400551
Hspb8	12	45906010	45912695	0.000263027	0.101	0.00239109	0.400551
Bicdl1	12	46615794	46681038	0.00389045	0.165	0.000661131	-0.820808
Bicdl1	12	46688612	46695318	0.000295121	0.489	0.000661131	-0.820808
Cabp1	12	47206512	47209736	2.23872e-07	0.222	0.000134484	-0.896362
RGD1560398	12	47555671	47556013	0.000123027	0.402	1.32202e-05	-0.755111
Git2	12	47612102	47621247	0.0144544	0.342	0.00015255	0.593587
Git2	12	47626491	47627165	0.0467735	0.0946	0.00015255	0.593587
Mmab	12	47933114	47933313	0.0446684	0.271	8.46142e-07	-0.866723
Mmab	12	47933954	47934301	0.000707946	0.555	8.46142e-07	-0.866723
Alkbh2	12	48260509	48262194	6.60693e-06	0.535	0.0446633	-0.420428
Svop	12	48351676	48351974	0.00616595	0.273	2.24846e-05	-0.900623
Coro1c	12	48550932	48552417	0.018197	0.179	0.0104785	0.335674
Selplg	12	48578098	48578760	4.46684e-07	0.448	1.69969e-07	0.885129
Tmem119	12	48603906	48604906	7.76247e-07	0.248	2.58597e-12	1.39932
Cmklr1	12	48792746	48792897	0.0316228	0.504	3.974e-33	2.62865
Sez6l	12	50242570	50242870	4.89779e-06	0.42	1.53202e-07	-0.793782
Ulk1	12	51933068	51933515	0.000891251	0.0828	0.00846037	-0.425719
P2rx2	12	52400562	52400809	0.0177828	-0.863	0.0367514	-0.614735
Map2k7	12	2550002	2550615	0.0204174	0.24	0.0476299	-0.330006
Evi5l	12	2588860	2589507	0.0020893	0.298	0.0198945	-0.400488
Evi5l	12	2589825	2590481	5.88844e-05	0.245	0.0198945	-0.400488
Fry	12	5575450	5581417	0.0281838	0.38	0.0027912	-0.523745
Hsph1	12	6323279	6331017	0.000128825	0.206	0.00127457	-0.475725
Hsph1	12	6341649	6341898	0.00281838	0.202	0.00127457	-0.475725
Mtus2	12	8127268	8156147	0.000467735	-0.7	2.08968e-05	-0.910712
Mtus2	12	8354716	8355266	0.0489779	-0.379	2.08968e-05	-0.910712
Wasf3	12	10298488	10298638	0.0123027	0.256	0.00579252	-0.467603
Wasf3	12	10299032	10299182	0.0489779	0.114	0.00579252	-0.467603
Arpc1b	12	11257399	11265799	3.98107e-06	0.329	5.96917e-33	1.86159
Lmtk2	12	12411420	12411819	5.62341e-05	-1.27	0.000400402	-0.659221
Lmtk2	12	12422535	12423383	0.0199526	0.12	0.000400402	-0.659221
Lmtk2	12	12423581	12423781	0.00190546	0.187	0.000400402	-0.659221
Lmtk2	12	12424478	12424728	0.00389045	0.342	0.000400402	-0.659221
Elfn1	12	16752734	16753134	0.0331131	0.468	0.012659	-0.610868
Fam20c	12	17914066	17916811	0.00102329	0.322	4.62552e-10	1.04567
Fam20c	12	17971746	17972043	0.00537032	-0.223	4.62552e-10	1.04567
Mcm7	12	19312461	19313065	0.0338844	-0.742	0.00638233	0.404258
Ephb4	12	22393932	22394231	0.0275423	0.448	0.00473538	0.50866
Ufsp1	12	22471578	22471822	0.00030903	0.579	1.7145e-05	-0.84199
Vgf	12	22678293	22678939	7.07946e-10	0.325	0.0113994	-0.556261
Vgf	12	22679137	22679535	0.00933254	0.248	0.0113994	-0.556261
Srrm3	12	23856748	23856949	0.00794328	-0.476	0.044856	-0.403563
Baz1b	12	24479729	24479980	0.0301995	0.375	0.046553	0.282773
Baz1b	12	24488549	24493080	0.0234423	0.369	0.046553	0.282773
Baz1b	12	24502247	24528021	0.0042658	0.211	0.046553	0.282773
Caln1	12	29655180	29743603	0.0354813	-0.318	0.000107337	-1.08163
Tyw1	12	29825236	29825484	0.00169824	0.686	0.0027133	0.465347
Rabgef1	12	29967250	29988792	0.0371535	0.178	0.0454483	-0.287602
Tpst1	12	30083496	30083746	0.0060256	0.256	0.0108947	0.400712
Glt1d1	12	32667611	32668460	0.017378	0.249	1.86797e-06	-1.14753
Aacs	12	36513389	36513539	0.0125893	-0.00293	4.53846e-11	-1.36392
Aacs	12	36518474	36521535	0.00281838	0.385	4.53846e-11	-1.36392
Snrnp35	12	37531226	37531711	2.69153e-07	0.508	0.0369341	-0.333315
Snrnp35	12	37531807	37532050	0.000239883	0.623	0.0369341	-0.333315
Arl6ip4	12	37904707	37906125	0.00199526	0.178	0.0177906	-0.452434
Hip1r	12	38025836	38026128	0.0057544	0.246	0.0373911	-0.412736
Hip1r	12	38029888	38030925	1.65959e-07	0.247	0.0373911	-0.412736
Bcl7a	12	38659392	38660233	0.0074131	0.238	0.00613094	-0.485547
Bcl7a	12	38660825	38661370	1.12202e-05	0.527	0.00613094	-0.485547
Rnf34	12	39165176	39170638	0.00229087	0.308	0.0285609	-0.362831
P2rx4	12	39308662	39309273	0.000891251	0.584	7.3685e-16	1.29391
Arpc3	12	39654192	39667769	0.00245471	0.152	5.00496e-06	0.658869
Pptc7	12	39732202	39732850	0.0120226	-0.276	0.000733262	-0.607465
Hvcn1	12	39822813	39823242	0.0074131	0.582	2.87685e-29	2.63924
Atxn2	12	40266340	40266591	0.025704	-0.355	0.0372034	-0.309552
Atxn2	12	40266690	40266991	0.0489779	-0.239	0.0372034	-0.309552
Atxn2	12	40287656	40294079	0.0128825	-0.172	0.0372034	-0.309552
Naa25	12	40628727	40628877	0.0128825	-1.28	0.0169947	-0.35655
Naa25	12	40665304	40667371	0.0131826	0.266	0.0169947	-0.35655
Hectd4	12	40713024	40713474	0.0338844	-0.124	0.0100164	-0.444153
Hectd4	12	40724168	40728142	0.00186209	0.244	0.0100164	-0.444153
Fbxo21	12	44244781	44245129	0.0446684	0.256	0.000986783	-0.515264
Fbxo21	12	44246221	44246668	0.0123027	0.27	0.000986783	-0.515264
Fbxo21	12	44252897	44260660	0.0323594	0.0706	0.000986783	-0.515264
Cit	12	46334718	46335067	0.0102329	0.0197	8.58279e-05	-0.793095
Cit	12	46360929	46371806	6.45654e-06	0.393	8.58279e-05	-0.793095
Pxn	12	46799596	46799796	0.042658	-0.295	1.37284e-09	1.00659
Pxn	12	46807052	46808339	0.0204174	0.262	1.37284e-09	1.00659
Pxn	12	46808537	46808990	0.0251189	0.215	1.37284e-09	1.00659
RGD1311899	12	47433454	47438910	7.94328e-13	0.206	0.0136707	-0.483351
Ankrd13a	12	47565661	47567467	0.000263027	0.317	0.0087331	0.370574
Ung	12	48247140	48247490	0.000758578	0.642	0.000740169	0.855764
Wscd2	12	48817273	48828552	0.00263027	-0.557	0.00185958	-0.792818
Ttc28	12	51453217	51495406	0.0416869	0.32	0.0111332	0.432244
LOC100909512	12	52602952	52603102	0.0457088	-1.6	0.00293941	-0.973318
Cdh20	13	24861219	24861419	0.0489779	0.273	0.043866	-0.308357
Cdh20	13	24912919	24913119	0.01	0.349	0.043866	-0.308357
Cdh20	13	24914114	24914413	3.89045e-06	-0.964	0.043866	-0.308357
RGD1307235	13	25748571	25751304	0.000954993	-1.06	0.0283255	-0.356979
RGD1307235	13	25751948	25752544	0.0128825	-0.381	0.0283255	-0.356979
Clasp1	13	34554432	34562776	0.00158489	0.286	0.000632127	-0.579435
Clasp1	13	34564730	34576658	0.0107152	0.275	0.000632127	-0.579435
Ccdc93	13	37469624	37470075	0.0229087	0.105	5.32325e-06	0.81995
Rab7b	13	48456192	48457158	0.0151356	0.574	0.000142679	0.601247
Rab7b	13	48477909	48481770	0.000630957	0.182	0.000142679	0.601247
Klhdc8a	13	49081179	49081330	0.0346737	0.541	3.38397e-06	-1.10634
LOC103690089	13	50077302	50079579	0.001	0.241	0.0479178	-0.409456
Syt2	13	51572745	51575524	0.000104713	0.175	6.26387e-07	-1.16653
Syt2	13	51576975	51577276	0.000457088	0.368	6.26387e-07	-1.16653
Syt2	13	51577474	51577724	0.00831764	0.239	6.26387e-07	-1.16653
Tnnt2	13	52673998	52680147	3.54813e-05	0.618	4.84153e-06	1.5747
Kif21b	13	52995359	52998228	0.0151356	0.261	0.000766567	-0.53928
Kif21b	13	52998377	53007817	0.0301995	0.143	0.000766567	-0.53928
Kif21b	13	53024312	53024960	0.00363078	0.137	0.000766567	-0.53928
Ddx59	13	53317368	53319321	0.0194984	-0.706	0.03013	0.449938
Ddx59	13	53324473	53324724	0.00891251	-0.85	0.03013	0.449938
Glrx2	13	60537880	60539677	0.00229087	-0.314	0.00837906	-0.498504
Uchl5	13	60603215	60603414	0.020893	0.63	0.00304722	-0.775022
Brinp3	13	63958097	63958297	0.0295121	-0.0214	0.00137443	-0.723173
Fam129a	13	69100902	69101202	0.0245471	0.493	8.67781e-08	1.08635
Arpc5	13	70174969	70177338	2.95121e-05	0.285	0.00269733	0.525047
Ncf2	13	70253575	70257534	0.00060256	0.62	3.43066e-25	2.93967
Rgs16	13	71181706	71183853	0.018197	0.0865	1.30622e-08	1.1159
Tor1aip2	13	73704087	73718945	0.0338844	-0.131	0.0134599	0.380356
Tor1aip2	13	73719889	73720089	0.00218776	-0.967	0.0134599	0.380356
Tor1aip2	13	73726583	73731510	2.63027e-08	0.215	0.0134599	0.380356
Tor1aip2	13	73733548	73733748	0.0213796	-1.02	0.0134599	0.380356
Vamp4	13	80465790	80479657	0.0151356	0.0534	0.0317285	-0.358453
Vamp4	13	80481402	80481552	0.0234423	-0.854	0.0317285	-0.358453
Vamp4	13	80481751	80481902	0.0102329	-0.888	0.0317285	-0.358453
Vamp4	13	80482150	80482300	0.00776247	-1.29	0.0317285	-0.358453
Vamp4	13	80482449	80482600	0.00537032	-1.41	0.0317285	-0.358453
Kifap3	13	82075855	82083372	0.0223872	0.224	1.41399e-06	-0.658921
Kifap3	13	82088406	82100084	0.00616595	-0.696	1.41399e-06	-0.658921
Slc19a2	13	82565294	82565593	0.0001	-1.54	0.0140656	-0.482074
Slc19a2	13	82565940	82566387	0.00109648	0.565	0.0140656	-0.482074
Ildr2	13	84531102	84531551	0.0040738	0.657	3.52974e-05	0.883548
Olfml2b	13	89019316	89030884	0.0288403	0.309	0.00019575	0.640666
Pfdn2	13	89725867	89742721	0.000316228	0.401	0.00181288	-0.606766
Arhgap30	13	89793986	89795369	1.62181e-06	0.373	5.75633e-21	1.99869
Cd84	13	90260938	90274635	0.00831764	0.293	1.34881e-19	2.37125
Slamf6	13	90321235	90321632	0.00114815	-0.187	2.85223e-11	3.73673
Igsf8	13	90702269	90702518	0.00691831	0.476	0.0126441	-0.385092
Igsf8	13	90702616	90703262	0.000295121	0.438	0.0126441	-0.385092
Kcnj10	13	90725693	90751705	4.57088e-06	0.258	0.00437073	-0.504408
Kcnj10	13	90752743	90753091	0.00588844	0.149	0.00437073	-0.504408
Kcnj10	13	90753189	90753338	0.00245471	-0.827	0.00437073	-0.504408
Cdc42bpa	13	98351549	98396946	0.0147911	0.221	0.0110617	-0.414715
Cdc42bpa	13	98446670	98447613	3.01995e-06	0.151	0.0110617	-0.414715
Itpkb	13	98617437	98618936	2.04174e-10	0.329	2.48394e-07	0.689346
Itpkb	13	98703197	98706966	0.0223872	0.252	2.48394e-07	0.689346
Parp1	13	98874413	98876408	0.018197	0.26	0.0170554	0.320887
Parp1	13	98877831	98881510	0.0234423	0.249	0.0170554	0.320887
Susd4	13	101306513	101307413	0.047863	0.177	6.13571e-05	-0.728757
Eprs	13	103323444	103353271	0.000323594	0.147	0.0473876	0.263724
Eprs	13	103362799	103367008	0.0416869	0.159	0.0473876	0.263724
Esrrg	13	106666929	106680755	0.0363078	-0.104	5.15199e-09	-1.17925
Esrrg	13	106680854	106681205	0.00616595	-0.562	5.15199e-09	-1.17925
Esrrg	13	106681803	106682254	0.0218776	-0.315	5.15199e-09	-1.17925
Esrrg	13	106682353	106683253	0.00707946	-0.303	5.15199e-09	-1.17925
Smyd2	13	108662985	108666238	0.000616595	0.234	0.0216808	-0.428646
Smyd2	13	108680602	108682990	0.047863	0.0265	0.0216808	-0.428646
Batf3	13	109715799	109724865	0.0011749	0.587	0.00392354	1.33131
Batf3	13	109725798	109726143	0.0275423	0.0544	0.00392354	1.33131
Tmem206	13	110031553	110031900	0.00301995	0.467	0.0112898	0.415428
Lpgat1	13	110398930	110443938	0.00707946	0.377	0.0417536	-0.339206
Lpgat1	13	110465398	110465698	0.0457088	-0.545	0.0417536	-0.339206
Lpgat1	13	110466692	110467042	0.000467735	-0.412	0.0417536	-0.339206
Lpgat1	13	110469828	110470028	0.0239883	-1.15	0.0417536	-0.339206
Ralb	13	35495808	35503267	0.0398107	0.142	0.00296971	0.448046
Dbi	13	36147807	36156029	0.00758578	0.158	0.0136244	0.374236
Ddx18	13	37527774	37528473	0.030903	-0.55	0.0103254	0.461657
Dpp10	13	39432728	39432978	0.0107152	-0.763	1.12859e-06	-0.831315
Dpp10	13	39449625	39490407	0.00114815	-0.525	1.12859e-06	-0.831315
Actr3	13	41713236	41738622	7.24436e-05	0.128	0.00706064	0.446107
Nckap5	13	42332205	42373745	0.00707946	0.687	0.000638945	0.832822
Mapkapk2	13	47786535	47787238	0.000275423	0.302	2.0856e-06	0.689848
Mapkapk2	13	47789674	47790149	0.00380189	0.235	2.0856e-06	0.689848
Srgap2	13	48066425	48066626	0.0123027	-0.596	0.00707595	0.41319
Srgap2	13	48119186	48134950	0.00158489	0.471	0.00707595	0.41319
Srgap2	13	48174002	48177356	0.00562341	0.323	0.00707595	0.41319
Cntn2	13	49285843	49286043	0.0060256	0.331	0.00712338	-0.476059
Plekha6	13	50557096	50557395	0.018197	-0.898	0.000405555	-0.483612
Plekha6	13	50557494	50557893	0.0047863	0.12	0.000405555	-0.483612
Plekha6	13	50566271	50571979	0.00017378	0.376	0.000405555	-0.483612
Plekha6	13	50575838	50578702	0.00204174	0.221	0.000405555	-0.483612
Adora1	13	51042554	51042802	0.000891251	0.244	0.0301549	-0.377729
Adora1	13	51043294	51043641	0.000151356	0.309	0.0301549	-0.377729
Ppfia4	13	51155815	51156590	0.0047863	0.462	0.00064481	-0.728361
Ppp1r12b	13	51588288	51588738	0.0295121	0.387	0.030558	-0.36481
Ppp1r12b	13	51784241	51784641	0.0331131	0.43	0.030558	-0.36481
Timm17a	13	52124839	52124990	0.000467735	0.421	0.000528819	-0.591195
Nav1	13	52265417	52266018	0.00102329	-0.522	0.00786719	0.465742
Nav1	13	52297927	52299439	0.0346737	0.252	0.00786719	0.465742
Camsap2	13	53145910	53146708	7.07946e-05	-0.641	0.0420572	-0.317475
Camsap2	13	53147006	53147505	1.51356e-06	-1.39	0.0420572	-0.317475
Camsap2	13	53148002	53158567	0.000199526	0.265	0.0420572	-0.317475
Camsap2	13	53159312	53160060	0.047863	0.299	0.0420572	-0.317475
Ptprc	13	55079564	55085430	0.0125893	0.34	9.11426e-20	2.48544
Ptprc	13	55173434	55173663	0.030903	0.602	9.11426e-20	2.48544
Cfh	13	56982374	56992973	0.000162181	-0.234	1.16581e-15	2.12766
Cfh	13	57003051	57006058	0.0380189	0.122	1.16581e-15	2.12766
Cfh	13	57008680	57008831	0.0123027	-0.29	1.16581e-15	2.12766
Rgs1	13	61066494	61070623	4.0738e-05	0.21	4.59655e-21	2.98599
Prg4	13	67677488	67678185	0.0131826	0.198	1.85435e-06	1.53123
Rnf2	13	68830909	68831060	0.047863	-2.04	0.00129676	0.554019
Rnf2	13	68831258	68831508	0.00831764	-2.08	0.00129676	0.554019
Lamc1	13	70661590	70666579	0.00047863	0.271	6.59212e-05	0.7263
Npl	13	70960399	70980884	0.0138038	0.312	7.09206e-19	1.91137
Cacna1e	13	71973016	71977535	0.00229087	-0.433	4.31982e-06	-0.832698
Ier5	13	72743155	72743405	0.00011749	0.367	3.9104e-08	1.07207
Tor1aip1	13	73670698	73671045	0.0398107	0.627	0.000103521	0.583225
Tor1aip1	13	73690408	73703048	0.000138038	0.981	0.000103521	0.583225
Tor1aip1	13	73704023	73704668	0.01	0.0831	0.000103521	0.583225
Tor3a	13	74252453	74252991	0.000104713	0.393	0.00245048	0.522502
Rabgap1l	13	77975491	77975842	0.0295121	-1.19	0.0168236	-0.452222
Rabgap1l	13	77976041	77976441	0.00141254	-1.29	0.0168236	-0.452222
Rabgap1l	13	77978689	77978940	0.047863	-1.49	0.0168236	-0.452222
Klhl20	13	78956144	78957226	0.011749	0.718	0.00161556	-0.475914
Dnm3	13	80192658	80223473	0.000588844	0.384	7.77695e-09	-0.84349
Mettl13	13	80427743	80428043	0.0223872	0.643	0.036096	-0.335436
Prrx1	13	81162286	81214417	0.00120226	-0.166	3.70063e-08	1.18756
Rcsd1	13	83855742	83865698	8.91251e-05	0.337	2.8522e-11	1.2269
Rcsd1	13	83871492	83916941	0.042658	0.512	2.8522e-11	1.2269
Hsd17b7	13	88288214	88288563	0.000134896	-2.38	1.30902e-13	-1.42223
Hsd17b7	13	88291045	88291194	0.0457088	-0.883	1.30902e-13	-1.42223
Hsd17b7	13	88291491	88291691	0.0251189	0.422	1.30902e-13	-1.42223
Ddr2	13	88314082	88314482	0.00724436	0.613	1.26686e-06	1.48243
Uhmk1	13	88521774	88522024	0.0060256	-1.13	0.000840101	-0.754568
Uhmk1	13	88523370	88527051	0.025704	0.036	0.000840101	-0.754568
Dusp12	13	89258456	89263363	0.0120226	0.446	0.0336543	-0.416674
Pcp4l1	13	89542474	89542918	0.0147911	0.257	6.30613e-05	-0.846849
Pcp4l1	13	89543507	89565625	0.0162181	0.165	6.30613e-05	-0.846849
Tomm40l	13	89590075	89590820	0.000295121	0.538	0.00227495	-0.427358
Atp1a2	13	90652827	90653376	0.0239883	0.206	0.00360644	-0.449362
Atp1a2	13	90667942	90669426	0.000147911	0.0476	0.00360644	-0.449362
Kcnj9	13	90703094	90703242	0.0436516	0.574	7.75951e-05	-0.887668
Kcnj9	13	90706972	90707121	0.020893	0.598	7.75951e-05	-0.887668
Slamf9	13	90836466	90836709	0.000275423	0.572	1.08036e-20	2.88511
Slamf8	13	90968307	90970725	0.0060256	0.219	4.70709e-16	1.84399
Cadm3	13	91842655	91843101	0.00776247	0.183	2.56352e-06	-0.814197
Rgs7	13	93095857	93096357	0.00436516	-0.354	2.05925e-05	-0.665493
Rgs7	13	93115150	93159828	0.00275423	0.296	2.05925e-05	-0.665493
Ahctf1	13	98025024	98032201	0.0112202	0.115	0.0200066	0.430656
Ahctf1	13	98078721	98078921	0.00912011	-0.945	0.0200066	0.430656
Adck3	13	98455036	98456867	0.017378	0.538	0.0135075	-0.427372
LOC100361558	13	99101151	99102780	0.00165959	0.156	0.00374425	0.395638
Enah	13	100298518	100298918	0.0316228	-0.878	0.0285137	-0.379701
Enah	13	100299366	100299866	6.0256e-05	-1.32	0.0285137	-0.379701
Enah	13	100300114	100313163	0.0269153	0.259	0.0285137	-0.379701
Hlx	13	102638015	102640893	0.0338844	0.082	4.53809e-16	1.80179
Tgfb2	13	105141364	105141712	0.0218776	0.432	7.30041e-05	0.771032
Kctd3	13	107434683	107434883	0.000190546	0.181	0.00971992	-0.441556
Rps6kc1	13	109362990	109363939	0.000165959	0.191	0.0331689	-0.315959
Atf3	13	109818836	109820702	0.000524807	0.357	9.72626e-53	2.83638
Traf3ip3	13	111896229	111901381	0.0190546	0.434	1.22193e-07	1.52847
Hsd11b1	13	111946625	111946875	0.00295121	-0.917	0.042172	-0.314992
G0s2	13	112004285	112004528	0.000380189	0.698	0.00030277	0.802139
Cplx1	14	2194944	2225166	1.07152e-05	0.287	3.34369e-06	-0.902184
Mfsd7	14	2319173	2319424	0.0371535	0.686	0.00276211	-0.53914
Fam69a	14	2858786	2859473	0.0107152	0.165	0.0476804	-0.36827
Klhl8	14	7190181	7190331	0.0186209	-0.619	0.0013742	-0.539061
Mapk10	14	8316110	8367321	0.000812831	-0.00584	2.77059e-05	-0.84788
Mapk10	14	8367420	8367720	0.0346737	-0.0471	2.77059e-05	-0.84788
Mapk10	14	8370211	8370511	0.0107152	-0.527	2.77059e-05	-0.84788
Tmem150c	14	11164298	11164595	0.00186209	0.518	0.00151787	-0.595737
Paqr3	14	14122416	14122666	0.0269153	-0.0813	0.000181279	-0.587821
Paqr3	14	14122914	14123114	0.0467735	-0.836	0.000181279	-0.587821
Paqr3	14	14123362	14123562	0.000288403	-1.79	0.000181279	-0.587821
Paqr3	14	14124307	14124706	0.00436516	-1.2	0.000181279	-0.587821
Paqr3	14	14126098	14126298	0.0446684	-1.62	0.000181279	-0.587821
Sowahb	14	16493318	16493618	0.00169824	-1.12	0.00031855	-1.24011
Cdkl2	14	17564306	17564556	0.0301995	-1.45	0.0127366	-0.386407
Cdkl2	14	17565551	17565850	2.95121e-05	-1.07	0.0127366	-0.386407
Lnx1	14	36149340	36149591	0.0354813	-0.766	0.00122582	-0.520223
Usp46	14	36751913	36752214	0.0288403	-0.708	0.0442529	-0.329461
Usp46	14	36753162	36753762	0.00114815	-0.633	0.0442529	-0.329461
Tec	14	37961251	37994666	0.000239883	0.987	7.11243e-08	1.39511
Tec	14	37997781	38015380	0.00074131	0.486	7.11243e-08	1.39511
Tec	14	38027305	38027754	0.000676083	0.431	7.11243e-08	1.39511
Atp8a1	14	42207805	42207956	0.0120226	-0.308	0.00597558	-0.408311
Apbb2	14	43524569	43524720	0.0380189	0.382	0.000984056	-0.453698
Lgi2	14	60791026	60791662	0.0338844	0.3	1.20484e-05	-1.06783
Ccdc149	14	60857923	60926703	5.12861e-05	0.462	0.000792031	-0.658977
Ccdc149	14	60942663	60952057	0.00562341	0.266	0.000792031	-0.658977
Adgra3	14	64785670	64786714	0.0147911	0.305	0.0152184	0.369689
Kcnip4	14	66744711	66747736	0.011749	0.512	2.16023e-06	-0.888751
Kcnip4	14	66748084	66749081	2.75423e-05	-0.514	2.16023e-06	-0.888751
Fam184b	14	70070501	70080067	0.00933254	1.31	1.68879e-05	-1.33161
Bod1l1	14	73765466	73792136	4.2658e-07	0.359	0.0433219	-0.342764
Wdr1	14	77022653	77023098	0.00112202	0.171	0.0128313	0.333472
Evc	14	78238400	78239306	0.0107152	-0.112	1.79849e-06	0.746847
Evc	14	78241222	78252317	0.0141254	0.145	1.79849e-06	0.746847
Tada2b	14	79454061	79455055	0.000446684	0.438	0.0461343	-0.296454
Tada2b	14	79455502	79456000	0.0457088	0.22	0.0461343	-0.296454
Htra3	14	80276283	80276434	0.00120226	0.316	9.51647e-13	1.37603
Tnip2	14	81488329	81501839	5.49541e-05	0.595	0.00129262	0.790147
Zfyve28	14	81789041	81792229	3.89045e-05	0.322	0.000166119	-0.838509
Letm1	14	82262176	82264299	5.12861e-06	0.374	0.0143818	-0.436384
Letm1	14	82267050	82267199	0.000794328	0.529	0.0143818	-0.436384
Pik3ip1	14	83560144	83560693	0.00537032	0.223	0.000349427	0.48266
Gal3st1	14	84247022	84247371	0.00323594	0.43	4.99524e-05	-0.799747
Tbc1d10a	14	84444739	84445034	0.00389045	0.321	0.000943995	0.534842
Nipsnap1	14	85136812	85137110	0.0363078	0.314	0.00493779	-0.437568
Xbp1	14	85753884	85756333	0.00114815	0.27	3.87866e-05	0.548663
Aebp1	14	86101748	86107067	7.94328e-13	0.364	2.92299e-15	1.5104
Aebp1	14	86109881	86111224	0.000416869	0.348	2.92299e-15	1.5104
Adcy1	14	87423746	87424594	8.31764e-06	0.451	0.000141385	-0.799699
Vwc2	14	91201637	91201837	0.0363078	0.566	0.00222295	-0.909282
LOC501396	14	94374940	94613150	0.00794328	-0.331	0.00324214	-0.58637
Vstm2a	14	99534335	99556117	0.040738	-0.101	3.70769e-08	-1.02849
Vstm2a	14	99557856	99558304	0.0398107	-0.478	3.70769e-08	-1.02849
Cnrip1	14	100220712	100246636	0.0288403	0.0116	0.00715504	-0.405869
Cnrip1	14	100246835	100247185	0.0398107	0.374	0.00715504	-0.405869
Ppp3r1	14	100355325	100358642	0.00489779	0.286	0.00079808	-0.496517
Ppp3r1	14	100359486	100359835	0.0316228	-1.04	0.00079808	-0.496517
Spred2	14	104289628	104290062	0.000870964	0.41	0.00404076	-0.547099
Zrsr1	14	107750161	107750905	9.33254e-06	0.635	0.00823202	-0.415886
Zrsr1	14	107751102	107751697	5.12861e-05	0.353	0.00823202	-0.415886
Rtn4	14	114127230	114127431	0.00239883	0.145	0.0028172	-0.420621
Rtn4	14	114142565	114151950	0.0281838	-0.471	0.0028172	-0.420621
Rtn4	14	114152299	114152499	0.00512861	0.423	0.0028172	-0.420621
Pkd2	14	6603933	6612110	0.000691831	0.259	0.000585801	0.643442
Spp1	14	6674130	6674477	0.0199526	0.211	2.03701e-07	0.824399
Ibsp	14	6802040	6803337	0.0239883	0.374	0.00253999	1.08874
Aff1	14	7226467	7226965	0.0281838	-0.636	5.48335e-06	0.789992
Gpat3	14	10343681	10344126	0.0223872	-0.454	0.00405029	-0.496376
Bmp2k	14	14126785	14126986	0.000549541	-1.17	2.73228e-06	0.671641
Bmp2k	14	14129684	14131084	0.00047863	0.211	2.73228e-06	0.671641
Anxa3	14	14389643	14399980	0.00104713	0.142	5.31486e-17	1.77923
Shroom3	14	16623215	16623764	0.0346737	0.442	0.0228097	0.433135
Art3	14	17171103	17187592	0.0489779	0.311	1.29193e-05	-0.60049
Rufy3	14	21059473	21068273	0.0489779	0.108	0.000758497	-0.448753
Stap1	14	23589432	23593231	0.00851138	-0.225	2.46389e-12	4.34682
Stap1	14	23604737	23604886	0.00295121	0.67	2.46389e-12	4.34682
Rest	14	33135430	33136230	0.000870964	0.335	2.81002e-05	0.856778
Rest	14	33150023	33150474	0.0177828	0.397	2.81002e-05	0.856778
RGD1311575	14	33653952	33661431	8.31764e-10	0.312	0.000675296	-0.632311
RGD1311575	14	33661628	33661878	0.00512861	0.149	0.000675296	-0.632311
RGD1311575	14	33662820	33664063	1.58489e-13	0.363	0.000675296	-0.632311
Pdgfra	14	35530716	35533995	8.91251e-06	0.364	0.00048852	0.693822
Dcun1d4	14	37212161	37212510	0.00645654	-1.2	0.0010021	-0.569171
Dcun1d4	14	37212956	37214403	4.0738e-07	-0.764	0.0010021	-0.569171
Slc10a4	14	37764838	37765325	0.011749	0.326	0.000146992	-0.774051
Gabrb1	14	38631989	38632289	0.047863	-0.458	0.035588	-0.372145
Gabrb1	14	38632488	38632838	4.0738e-05	-1.88	0.035588	-0.372145
Slc30a9	14	42486618	42510805	0.00169824	0.231	0.00472922	-0.416005
Limch1	14	42760810	42761110	0.0144544	-0.389	0.00785256	-0.353646
Limch1	14	42778935	42790760	0.000239883	0.233	0.00785256	-0.353646
Limch1	14	42792569	42845575	1.7378e-05	0.184	0.00785256	-0.353646
Ube2k	14	44316689	44348691	0.000128825	0.268	0.0218487	-0.405974
Tbc1d1	14	45632119	45632270	0.0269153	-0.454	0.0107841	0.440769
Tbc1d1	14	45677381	45689990	8.91251e-07	1.14	0.0107841	0.440769
LOC498368	14	46051438	46053165	0.000851138	0.279	1.11995e-06	0.939776
Pcdh7	14	54650199	54837271	0	-0.483	0.00440384	-0.478269
Pcdh7	14	55080435	55080885	0.00263027	0.356	0.00440384	-0.478269
Pcdh7	14	55081083	55081632	0.00954993	0.175	0.00440384	-0.478269
Rbpj	14	59660182	59660632	0.00323594	-1.67	0.00103645	0.624176
Sod3	14	60958881	60959877	0.00724436	0.0072	1.87369e-07	0.871933
Kctd8	14	61912340	61912737	0.0109648	-0.768	0.00216333	-0.595885
Cd38	14	71716407	71718131	0.0346737	0.209	1.60262e-10	1.01851
Evc2	14	78159895	78164736	0.0147911	0.313	1.55867e-07	0.948308
Jakmip1	14	78425041	78431644	0.00380189	0.235	1.97273e-05	-0.79464
Jakmip1	14	78443266	78446692	0.01	0.398	1.97273e-05	-0.79464
Jakmip1	14	78447816	78462813	0.000295121	0.365	1.97273e-05	-0.79464
Ppp2r2c	14	78679213	78679463	0.000281838	0.166	0.00335486	-0.625646
Afap1	14	79923780	79925905	0.000416869	0.283	0.00130886	0.55323
Whsc1	14	82120805	82121055	0.00512861	-0.165	0.0287393	-0.31675
Whsc1	14	82142475	82142775	0.0239883	-0.573	0.0287393	-0.31675
Whsc1	14	82143422	82143622	0.00151356	-1.11	0.0287393	-0.31675
Whsc1	14	82146762	82160851	0.0363078	0.309	0.0287393	-0.31675
Whsc1	14	82168580	82171449	0.0489779	0.268	0.0287393	-0.31675
Ywhah	14	83053585	83062424	8.91251e-10	0.235	0.000252958	-0.583319
Depdc5	14	83092193	83092344	0.0301995	0.454	0.0377401	-0.297613
Depdc5	14	83197422	83208880	0.00933254	-0.911	0.0377401	-0.297613
Osbp2	14	83945272	83951606	0.0104713	0.253	0.00712411	-0.502512
Sec14l2	14	84353502	84360108	0.00691831	0.461	0.00129131	-0.514211
Cabp7	14	84968521	84968919	0.000134896	0.287	5.96287e-06	-0.960321
Cabp7	14	84969810	84969960	7.76247e-05	0.26	5.96287e-06	-0.960321
Nefh	14	85182120	85183069	0	0.46	6.24697e-06	-0.928906
Kremen1	14	85441553	85445312	0.00104713	0.5	4.17549e-05	0.917393
Urgcp	14	85958173	85959071	0.020893	0.162	0.0445746	-0.308112
Urgcp	14	85959269	85959868	6.0256e-06	0.335	0.0445746	-0.308112
Urgcp	14	85960066	85960366	0.01	0.24	0.0445746	-0.308112
Urgcp	14	85960664	85970343	5.37032e-09	0.369	0.0445746	-0.308112
Tns3	14	88674770	88676668	6.60693e-07	0.354	3.91916e-06	0.609127
Tns3	14	88739316	88740216	0.0162181	-0.0111	3.91916e-06	0.609127
Ddc	14	91909103	91910298	0.000851138	-0.942	0.0016712	-0.834337
Meis1	14	103182769	103186032	0.00269153	0.354	0.0471716	-0.389425
RGD1305110	14	108322483	108322782	3.46737e-05	-1.51	4.88171e-05	-0.645788
RGD1305110	14	108354827	108365635	0.0295121	-0.332	4.88171e-05	-0.645788
Eml6	14	114175981	114176132	0.0213796	-1.06	0.033606	-0.362736
Erlec1	14	115337113	115347422	0.0204174	-0.165	0.0449757	-0.332728
Usp54	15	4178267	4178418	0.0104713	0.269	0.033266	-0.345543
Usp54	15	4189263	4189413	0.001	0.168	0.033266	-0.345543
Ppp3cb	15	4236147	4236447	0.0154882	0.144	0.0145471	-0.473375
Anxa7	15	4274589	4276946	0.000977237	0.086	6.01244e-06	0.639682
Gng2	15	4850322	4850522	0.0144544	0.314	0.00750284	-0.427091
Rpl15	15	8190810	8191459	0.00245471	-0.229	1.24663e-05	0.638862
LOC103690082	15	12795268	12795518	0.00346737	0.294	3.29357e-11	-1.11172
Cadps	15	15275686	15275934	0.000269153	0.276	4.61846e-06	-1.00094
Cadps	15	15654536	15658544	0.00323594	-0.31	4.61846e-06	-1.00094
LOC361016	15	17836033	17841211	0.0467735	-0.0569	0.00231651	-0.616713
LOC361016	15	17841309	17918167	0.0288403	0.178	0.00231651	-0.616713
Fam107a	15	18411135	18413912	0.0239883	0.165	3.46807e-14	1.27228
Fam107a	15	18415359	18415560	0.0204174	0.254	3.46807e-14	1.27228
Fbxo34	15	24332497	24333146	0.00316228	0.39	0.0373424	-0.360359
Fbxo34	15	24333344	24334541	1.02329e-05	0.417	0.0373424	-0.360359
Naa30	15	26033798	26049742	0.00870964	0.355	0.00876428	-0.471076
Naa30	15	26050735	26050885	0.0295121	-1.19	0.00876428	-0.471076
Apex1	15	27851483	27851634	0.00123027	0.309	0.0189856	0.321016
Arhgef40	15	28381915	28383862	3.16228e-11	0.365	0.00690728	0.407096
Arhgef40	15	28402641	28402792	0.00017378	0.573	0.00690728	0.407096
Abhd4	15	32905561	32905962	0.00239883	0.243	0.00160078	0.425624
Mmp14	15	33082816	33083266	0.00489779	0.412	5.57412e-11	1.40557
Lrp10	15	33113155	33113305	0.00954993	-0.0191	2.01777e-06	0.696604
Lrp10	15	33114283	33114731	0.000186209	0.404	2.01777e-06	0.696604
Bcl2l2	15	33546442	33546641	0.000645654	0.302	0.00476719	-0.46412
Thtpa	15	33755997	33757831	3.89045e-05	0.199	0.00265171	-0.41603
Psme1	15	34257329	34258002	0.0128825	0.348	5.41507e-11	1.00166
Irf9	15	34283639	34284927	0.0112202	0.229	1.22786e-07	0.763979
Khnyn	15	34553644	34553844	0.00346737	0.17	0.00114016	0.618305
Mphosph8	15	36918941	36934597	0.0109648	0.357	0.00503266	-0.545379
Amer2	15	40665021	40667258	0.0263027	0.186	0.0013432	-0.642028
Sacs	15	41458852	41459152	0.0457088	-0.564	9.85556e-07	-0.874379
Sacs	15	41506140	41506440	0.00218776	-0.705	9.85556e-07	-0.874379
Sacs	15	41525773	41526472	0.0389045	-0.263	9.85556e-07	-0.874379
Sacs	15	41527369	41527968	0.00645654	-0.351	9.85556e-07	-0.874379
Clu	15	42653168	42659374	1.14815e-05	0.329	1.51444e-15	1.12818
Stmn4	15	43019925	43025246	0.00724436	0.209	0.00750073	-0.383404
Stmn4	15	43025507	43025754	0.000134896	0.353	0.00750073	-0.383404
Adra1a	15	43392093	43392691	0.0042658	-0.523	0.00117504	-0.74108
Pnma2	15	43586593	43588137	1.28825e-10	0.353	0.000109406	-0.774381
Kctd9	15	44435387	44437357	0.00912011	0.498	3.68246e-05	-0.734763
Kctd9	15	44437455	44437804	0.00616595	-1.09	3.68246e-05	-0.734763
Kctd9	15	44438301	44438600	0.000812831	-1.15	3.68246e-05	-0.734763
Nefl	15	44802074	44802955	8.91251e-05	0.36	2.2122e-05	-0.932167
Fbxo16	15	48700044	48705744	0.001	-0.847	0.031555	-0.498732
Phyhip	15	52154679	52156845	0.00017378	-1.14	0.00143791	-1.04096
Phyhip	15	52158795	52158995	0.00263027	-0.988	0.00143791	-1.04096
Lgi3	15	52225922	52226121	0.0275423	0.28	0.000177281	-0.689643
Dok2	15	52451270	52451470	0.0489779	0.452	0.0146038	0.625325
Lpar6	15	55126952	55127442	0.00588844	0.469	4.82282e-05	1.19859
Lpar6	15	55127930	55128078	0.00954993	0.716	4.82282e-05	1.19859
Kctd4	15	58016279	58016579	0.0218776	0.615	0.00119105	-0.889739
Kctd4	15	58016678	58017377	7.07946e-05	0.597	0.00119105	-0.889739
Epsti1	15	60085013	60182473	0.00660693	0.00829	6.56113e-16	2.06231
Elf1	15	61854385	61857775	0.0131826	0.152	1.46655e-07	1.03617
Pcdh17	15	67557498	67558047	0.017378	0.417	0.00238077	-0.500453
Pcdh17	15	67558146	67627584	0.000691831	0.437	0.00238077	-0.500453
Pcdh17	15	67643306	67644752	0.0323594	0.216	0.00238077	-0.500453
Pcdh17	15	67647092	67647691	0.00204174	-0.95	0.00238077	-0.500453
Ndfip2	15	89407572	89407818	0.0040738	0.142	0.0405751	-0.301221
Cln5	15	93642854	93643103	0.00295121	-0.633	0.00140452	0.552013
Slitrk5	15	96823474	96823873	0.030903	-0.495	0.000238704	-0.742878
Dnajc3	15	104210952	104219770	0.01	0.309	0.00164244	0.539588
Mbnl2	15	105640146	105688085	0.000186209	0.282	0.0354064	-0.317267
Vcl	15	3456206	3456406	0.0371535	-1.52	0.0465877	0.325672
Vcl	15	3456803	3457202	0.0128825	0.291	0.0465877	0.325672
Zfp385d	15	6201022	6233051	0.00109648	-0.622	0.044732	-0.510893
Nkiras1	15	8180766	8181973	0.0269153	0.155	3.03212e-07	-0.994955
Thrb	15	8891025	8891275	0.040738	-0.479	0.0110889	-0.455016
Synpr	15	14558612	14559056	0.0042658	-0.678	0.000636225	-0.738487
Synpr	15	14559154	14559992	0.00229087	-0.768	0.000636225	-0.738487
RGD1310110	15	26677126	26677821	0.00912011	0.302	1.41497e-06	-0.787361
Sall2	15	28728967	28729764	0.00446684	0.26	0.00251183	-0.470168
Sall2	15	28730310	28730858	8.70964e-05	0.218	0.00251183	-0.470168
RGD1560492	15	33337324	33337623	0.0074131	0.709	0.00118828	1.32575
Slc7a8	15	33428595	33428942	0.00301995	0.552	0.000224405	0.632475
Jph4	15	33767611	33767959	0.000812831	0.404	0.000276159	-0.707496
Jph4	15	33769985	33770464	0.000301995	0.0984	0.000276159	-0.707496
Jph4	15	33773398	33773598	0.00812831	0.0989	0.000276159	-0.707496
Jph4	15	33773944	33774915	0.00158489	0.0223	0.000276159	-0.707496
Tm9sf1	15	34314693	34314991	0.0346737	-0.675	0.0154181	0.339183
Gjb2	15	37378587	37379225	0.0223872	0.245	3.94175e-11	1.56635
Zdhhc20	15	38109282	38113476	0.00144544	-0.68	0.0265608	-0.499173
Atp8a2	15	39958186	39958437	0.0204174	-0.972	1.00852e-07	-1.14469
Atp8a2	15	39960234	39960585	0.0316228	-0.394	1.00852e-07	-1.14469
Atp8a2	15	39961483	39961634	0.0042658	-0.8	1.00852e-07	-1.14469
Atp8a2	15	39963631	39963832	0.00562341	0.455	1.00852e-07	-1.14469
Sgcg	15	41549329	41549779	0.0331131	0.347	0.00797595	0.568476
Scara3	15	42606837	42615894	0.00416869	0.341	3.03202e-34	1.77484
Scara3	15	42616041	42616832	0.000794328	0.184	3.03202e-34	1.77484
Ptk2b	15	42831013	42839304	0.0301995	0.425	0.018586	0.379538
Dpysl2	15	43496214	43501500	0.000263027	0.0633	0.00123228	-0.49085
Nefm	15	44855848	44856095	0.000354813	0.571	4.09834e-07	-1.07699
Nefm	15	44856242	44857031	1.99526e-13	0.62	4.09834e-07	-1.07699
Nefm	15	44859618	44860111	7.94328e-12	0.253	4.09834e-07	-1.07699
Fdft1	15	46340826	46341271	0.0218776	0.227	4.34558e-12	-1.23971
Elp3	15	48943462	48943613	0.00141254	0.368	0.0240983	-0.325786
Chmp7	15	51385422	51385670	0.000346737	0.281	0.0330965	-0.294356
Chmp7	15	51385917	51386215	0.0107152	0.449	0.0330965	-0.294356
Chmp7	15	51387845	51388290	0.0169824	0.147	0.0330965	-0.294356
Rhobtb2	15	51476736	51477136	0.00794328	0.431	0.00798354	-0.42567
Dmtn	15	52293549	52293796	0.0162181	0.288	0.000111685	-0.876451
Akap11	15	60723032	60723332	0.0269153	-0.801	0.011761	-0.495091
Akap11	15	60724127	60724277	0.0138038	-2.52	0.011761	-0.495091
Akap11	15	60724376	60724675	0.000691831	-1.22	0.011761	-0.495091
Akap11	15	60725321	60725670	0.0190546	-0.616	0.011761	-0.495091
Akap11	15	60733259	60740330	0.000501187	-0.401	0.011761	-0.495091
Akap11	15	60741921	60742818	0.0042658	-0.104	0.011761	-0.495091
Akap11	15	60744060	60744509	0.0042658	0.427	0.011761	-0.495091
Pcdh8	15	62197114	62197955	0.0275423	0.217	0.0132903	-0.526308
Pcdh8	15	62198826	62199026	0.00346737	-0.714	0.0132903	-0.526308
Pcdh9	15	76787207	76788106	0.00020893	-1.29	0.000126996	-0.623496
Pcdh9	15	76788204	76789203	0.00141254	-0.144	0.000126996	-0.623496
Pcdh9	15	77735794	77736743	0.0467735	0.0298	0.000126996	-0.623496
Pcdh9	15	77738218	77738618	0.042658	0.251	0.000126996	-0.623496
Mzt1	15	83430281	83430580	0.0151356	-0.949	0.0344818	-0.469128
Mzt1	15	83430678	83436929	0.0363078	-0.518	0.0344818	-0.469128
Kctd12	15	87389527	87389678	0.00416869	0.502	2.74357e-09	1.08616
Kctd12	15	87389977	87390227	0.00147911	0.383	2.74357e-09	1.08616
LOC108352957	15	87499938	87517653	0.00776247	0.679	0.0194865	-0.668789
Ednrb	15	88005023	88005423	0.000416869	-0.92	0.0001727	0.544652
Ednrb	15	88005871	88006221	0.00186209	0.00885	0.0001727	0.544652
Ednrb	15	88006469	88007467	3.01995e-07	-0.284	0.0001727	0.544652
Ednrb	15	88035159	88035858	0.0114815	0.183	0.0001727	0.544652
Slitrk1	15	93303830	93304878	0.0269153	0.328	7.2923e-08	-1.00611
Slitrk1	15	93305026	93306872	0.00954993	0.203	7.2923e-08	-1.00611
Dzip1	15	104147409	104147998	0.0213796	0.3	0.000127606	-0.676001
Dock9	15	107947357	107947508	0.0380189	-1.62	0.00315346	-0.469744
Dock9	15	108079828	108083389	0.0151356	0.649	0.00315346	-0.469744
Dock9	15	108210717	108210867	0.00933254	-0.97	0.00315346	-0.469744
Gpr183	15	108365294	108365543	0.001	0.679	2.60131e-10	1.94877
Gpr183	15	108365641	108376171	0.0239883	0.214	2.60131e-10	1.94877
Nalcn	15	109734291	109734442	0.0316228	-1.43	0.000895946	-0.571047
Nalcn	15	109735140	109735391	0.0301995	-1.23	0.000895946	-0.571047
Rps24	16	758579	762043	0.000562341	0.29	0.000145529	0.546699
Zmiz1	16	1950885	1951435	0.00102329	0.343	0.0079225	0.451146
Zmiz1	16	1951534	1951885	1.94984e-05	0.365	0.0079225	0.451146
Zmiz1	16	1953833	1954133	3.46737e-06	-0.737	0.0079225	0.451146
Zmiz1	16	1954382	1954533	0.0165959	-1.52	0.0079225	0.451146
Arhgef3	16	2984477	3004662	0.0134896	0.449	0.0170393	-0.347082
Arhgef3	16	3025275	3026221	0.00223872	0.444	0.0170393	-0.347082
Plac9	16	3862632	3865575	0.00218776	0.0893	2.78711e-07	1.22523
Chdh	16	6107064	6108198	0.0123027	0.258	9.43e-10	1.51821
Drgx	16	8829541	8832478	0.0346737	-0.491	0.016896	-0.629759
Drgx	16	8852449	8852891	0.0338844	0.644	0.016896	-0.629759
Gdf10	16	10261500	10261844	0.0295121	0.4	0.00171303	1.10484
Anxa8	16	10417223	10424928	0.0138038	0.442	1.31955e-05	1.17862
Wapl	16	11029802	11030051	0.00301995	0.639	0.000326173	0.873773
Wapl	16	11107526	11107676	0.0346737	-0.969	0.000326173	0.873773
Wapl	16	11108221	11108420	0.0363078	-1.01	0.000326173	0.873773
Myo9b	16	19739248	19739599	1.38038e-07	0.414	0.0018014	0.537898
Myo9b	16	19753614	19753965	0.000371535	0.397	0.0018014	0.537898
Colgalt1	16	20051042	20051240	2.45471e-06	0.179	4.46246e-12	1.09019
Pgpep1	16	20530355	20530555	0.00295121	0.33	0.000150302	0.647861
Tmem59l	16	20694413	20694777	0.00269153	0.117	8.87112e-06	-0.891531
Ncan	16	21061120	21061567	0.00030903	0.326	2.8943e-05	0.656743
Ncan	16	21075616	21076014	0.0040738	0.0859	2.8943e-05	0.656743
Lzts1	16	22295538	22304632	0.000301995	0.283	0.00127952	-0.547741
Psd3	16	23687899	23751788	0.00301995	0.464	0.00523275	-0.570761
Psd3	16	23784216	23784417	0.000870964	-1.75	0.00523275	-0.570761
Psd3	16	23786565	23786766	0.0165959	-1.26	0.00523275	-0.570761
Psd3	16	23786964	23787615	0.000239883	-0.573	0.00523275	-0.570761
LOC100360205	16	31946378	31947522	0.0436516	0.229	0.00341888	0.511589
Clcn3	16	32518805	32519205	0.0269153	-0.733	0.00677535	-0.463344
Cyp4v3	16	50136142	50136492	0.00489779	-0.732	7.6586e-06	1.18112
Asah1	16	54021303	54024544	0.00954993	-0.328	0.00360193	0.677363
Asah1	16	54024748	54027804	0.0269153	-0.469	0.00360193	0.677363
Dctn6	16	61795543	61811488	0.00537032	0.292	0.0206658	-0.381313
Plekha2	16	71783543	71783939	0.020893	0.364	2.56513e-07	1.16823
LOC100910418	16	73757471	73758056	0.00104713	-3.12	0.00326031	1.09569
Ikbkb	16	74219860	74223285	8.70964e-05	0.165	7.33673e-06	0.665779
Tdrp	16	80729978	80753504	8.91251e-05	0.324	0.000494778	-0.649862
Coprs	16	80826772	80831028	0.000281838	0.266	0.00633347	-0.394463
Rab20	16	83381242	83382080	0.000177828	0.461	1.03208e-07	1.35851
Col4a1	16	83590932	83596602	0.00501187	0.169	0.00145488	0.688105
Col4a1	16	83600360	83603731	0.0346737	0.108	0.00145488	0.688105
Col4a1	16	83610577	83612351	9.77237e-05	0.338	0.00145488	0.688105
Col4a1	16	83612539	83616199	5.49541e-05	0.349	0.00145488	0.688105
Irs2	16	83824861	83825309	0.0141254	0.279	0.0084553	-0.404794
Irs2	16	83848022	83848470	0.0057544	-0.000661	0.0084553	-0.404794
Fam155a	16	85528721	85529219	0.0354813	0.0501	0.00856575	-0.539263
Fam155a	16	86051310	86052255	0.00524807	0.16	0.00856575	-0.539263
Fam155a	16	86052800	86052950	0.0107152	-1.14	0.00856575	-0.539263
Polr3a	16	718018	718168	0.0177828	0.473	0.00202697	-0.482337
Cacna2d3	16	5126133	5160288	0.025704	-0.45	6.05224e-06	-0.868065
Cacna1d	16	6111142	6111393	0.0218776	-1.34	1.57925e-05	-0.776814
Mettl6	16	7573735	7573980	0.0416869	-0.202	0.00864505	0.447481
Mettl6	16	7574271	7574467	0.0234423	-0.611	0.00864505	0.447481
Wdfy4	16	9283744	9314967	7.07946e-06	0.629	2.35614e-25	2.30544
Mapk8	16	9624425	9624724	0.0380189	-0.84	0.0322548	-0.379226
Ldb3	16	10915548	10915748	0.020893	-0.73	0.0122113	-0.484698
Ldb3	16	10931635	10941238	0.000363078	0.402	0.0122113	-0.484698
Ccser2	16	14092446	14093147	9.12011e-05	-0.574	0.000898066	-0.497719
Ccser2	16	14093396	14093997	0.000645654	-0.407	0.000898066	-0.497719
Ccser2	16	14185987	14186788	0.0047863	-0.215	0.000898066	-0.497719
Tmem38a	16	18960389	18960584	0.00758578	0.409	0.000233175	-0.826501
Rab8a	16	19356042	19366457	0.00380189	0.135	0.00275874	0.405508
Tpm4	16	19385908	19399851	3.71535e-05	0.278	8.4693e-13	1.08336
Abhd8	16	19866423	19866573	0.00457088	0.197	0.0033245	-0.687471
Ano8	16	19889052	19889700	0.00398107	0.15	0.0234383	-0.378103
Ano8	16	19893568	19894359	0.0316228	-0.109	0.0234383	-0.378103
Lrrc25	16	20558118	20558717	2.23872e-05	0.881	6.99979e-17	2.35461
Ell	16	20596317	20601059	0.00331131	0.413	0.0217147	0.389862
Cers1	16	20847129	20847475	0.0269153	0.233	0	0
Gdf1	16	20847129	20847475	0.0269153	0.233	0	0
Homer3	16	20882969	20883417	0.0199526	0.304	0.00103325	0.548929
Homer3	16	20888659	20890869	1.77828e-05	0.342	0.00103325	0.548929
Sugp2	16	20908711	20908912	0.0467735	0.422	0.0106103	-0.406197
Hapln4	16	21083119	21083818	0.00165959	0.198	1.37248e-05	-0.977225
Gmip	16	21350345	21350644	0.0213796	0.441	0.000110082	0.730062
Gmip	16	21357452	21360480	0.0141254	0.327	0.000110082	0.730062
Nat1	16	23972137	23972437	0.00275423	0.665	0.00878549	1.09088
Spock3	16	28372415	28376587	1.47911e-05	-0.71	1.12745e-06	-0.918156
Sh3rf1	16	32064408	32073751	0.0288403	0.54	0.000153658	0.634986
Sh3rf1	16	32120857	32225802	3.38844e-06	0.63	0.000153658	0.634986
Dctd	16	47177788	47178087	0.0001	0.527	8.03904e-12	1.57086
Acsl1	16	48937455	48937704	0.0316228	-2.38	0.0231229	-0.346332
Sorbs2	16	49626204	49626354	0.00128825	-2.1	0.00738815	-0.385665
Sorbs2	16	49626601	49626900	0.0234423	-0.881	0.00738815	-0.385665
Micu3	16	55044348	55044499	0.0489779	-0.7	1.66787e-05	-0.748502
Micu3	16	55044598	55045298	0.00630957	-0.418	1.66787e-05	-0.748502
Msr1	16	56854923	56855171	0.0109648	0.549	4.96491e-41	3.97849
Msr1	16	56855566	56875119	0.00371535	-0.013	4.96491e-41	3.97849
Purg	16	62453157	62471340	0.00190546	0.998	4.29014e-05	-0.816156
Dusp26	16	64798831	64798981	0.0323594	0.239	0.0287559	-0.465279
Adgra2	16	69094836	69095036	0.00457088	0.0279	4.23454e-09	0.971391
Adgra2	16	69096283	69096633	0.0030903	0.193	4.23454e-09	0.971391
Zmat4	16	72764653	72765053	0.0234423	-0.574	1.52586e-06	-0.957182
Sfrp1	16	73374101	73374501	0.0190546	0.545	0.00552183	0.699113
Ank1	16	73681421	73687396	0.000891251	0.183	0.000182783	-0.915537
Kat6a	16	73946505	73950306	0.00074131	0.215	0.0230773	0.402015
Alg11	16	74854403	74854553	0.0398107	-0.619	0.0256802	-0.438717
Alg11	16	74857777	74860556	0.00457088	0.0798	0.0256802	-0.438717
Kbtbd11	16	79698871	79699417	0.042658	0.364	0.00725889	-0.438874
Kbtbd11	16	79700159	79715485	0.0040738	0.252	0.00725889	-0.438874
Gas6	16	81213462	81213811	0.00323594	0.211	0.0457415	0.294657
Mcf2l	16	81841579	81847843	0.0025704	0.166	0.000454295	-0.741836
Mcf2l	16	81858809	81859626	0.00524807	0.13	0.000454295	-0.741836
Mcf2l	16	81947223	81947972	0.0457088	-0.322	0.000454295	-0.741836
Col4a2	16	83396369	83397040	0.00025704	0.344	0.0128424	0.512558
Col4a2	16	83434657	83438560	0.00346737	0.0449	0.0128424	0.512558
Habp4	17	1679959	1701497	1.02329e-08	0.311	1.1138e-05	-0.873475
Cdk20	17	1941924	1942470	0.0295121	-0.28	0.00251193	0.578788
Gas1	17	4848105	4848305	0.0151356	0.242	9.49106e-12	1.43377
Isca1	17	5290748	5293313	0.0213796	0.197	0.00317458	-0.427344
Golm1	17	5399848	5407038	7.58578e-07	0.223	7.76846e-16	1.48457
Agtpbp1	17	5511449	5524170	0.0128825	-0.298	4.48077e-05	-0.615533
Spock1	17	7786189	7797475	0.0251189	0.188	0.00639779	-0.504293
Cxcl14	17	9117313	9117509	0.00120226	0.181	5.20544e-39	1.96781
H2afy	17	9289373	9320809	2.18776e-05	0.082	0.00101747	0.46001
Uimc1	17	10123982	10130724	0.0229087	0.308	0.0485116	0.378958
Sncb	17	10384519	10385051	0.00288403	0.181	0.00015078	-0.891385
Sncb	17	10385147	10392341	8.31764e-10	0.331	0.00015078	-0.891385
Gprin1	17	10412076	10412925	0.020893	0.365	0.00232154	-0.659774
Gprin1	17	10413024	10413474	0.0229087	0.39	0.00232154	-0.659774
Gprin1	17	10413623	10413823	0.00676083	0.471	0.00232154	-0.659774
Cltb	17	10537493	10554609	0.00190546	0.327	0.016917	-0.375118
Nfil3	17	12275520	12276167	0.047863	0.208	0.0130634	0.449034
Diras2	17	12738127	12763777	2.63027e-06	0.37	2.5885e-05	-0.855639
Diras2	17	12764370	12764669	0.000467735	-0.699	2.5885e-05	-0.855639
Susd3	17	15824569	15830179	0.017378	0.252	0.0194682	0.567348
Dek	17	17965920	17970384	0.000218776	0.485	0.0256437	0.386268
Dek	17	17971174	17986130	0.0467735	-0.125	0.0256437	0.386268
Dek	17	17987391	17987590	0.00645654	-0.859	0.0256437	0.386268
Elovl2	17	21421079	21421228	0.0380189	-1.44	0.0144113	-0.332276
Nedd9	17	23172553	23177957	0.00676083	0.165	0.0421078	0.369969
Bloc1s5	17	26831979	26832127	4.0738e-05	0.565	0.022189	-0.339592
Slc22a23	17	31399661	31400506	0.00125893	0.352	0.0106492	-0.382567
Slc22a23	17	31402492	31402841	0.0141254	-0.188	0.0106492	-0.382567
Gmds	17	33824044	33937891	0.0288403	0.123	0.0400043	0.349189
Sox4	17	37615962	37616161	0.0162181	0.318	1.50149e-16	1.38748
Aldh5a1	17	42151790	42155425	0.0467735	-0.0735	2.3293e-06	-0.680889
Epdr1	17	47420762	47421105	0.01	0.414	6.18524e-05	-0.560549
Hecw1	17	53476938	53479423	0.0040738	0.173	2.27207e-06	-1.03412
Hecw1	17	53773683	53774432	0.0194984	-0.264	2.27207e-06	-1.03412
Hecw1	17	53774780	53775080	0.000281838	-2.15	2.27207e-06	-1.03412
Hecw1	17	53775528	53776028	0.00169824	-0.947	2.27207e-06	-1.03412
Hecw1	17	53776974	53777374	0.000229087	-1.94	2.27207e-06	-1.03412
Kif5b	17	54194292	54195983	0.00125893	-0.00173	0.0447271	-0.275594
Kif5b	17	54196513	54211110	0.0017378	0.192	0.0447271	-0.275594
Wdr37	17	58048387	58048635	0.0025704	-0.914	0.000111458	-0.598145
Wdr37	17	58048882	58049328	0.000416869	-0.811	0.000111458	-0.598145
Wdr37	17	58050565	58050863	0.00134896	-1.05	0.000111458	-0.598145
Dip2c	17	63803740	63807690	0.0131826	0.417	0.00057785	-0.593979
Net1	17	70015337	70016251	0.0398107	0.271	1.78412e-07	1.07542
Pfkfb3	17	70711200	70711897	0.0245471	0.231	0.0026315	0.435701
Pfkfb3	17	70713188	70713537	0.0416869	-0.294	0.0026315	0.435701
Cdc123	17	76410676	76428534	3.98107e-06	0.365	0.00927882	-0.348861
Camk1d	17	76936313	76937111	0.0323594	-0.239	0.00155421	-0.663803
Rpp38	17	78918345	78919144	0.00588844	0.469	0.0280609	-0.489883
Pter	17	80310892	80311142	0.0288403	0.5	0.0016832	0.944448
Plxdc2	17	83611844	83612795	0.00263027	-0.648	6.0809e-05	0.76283
Plxdc2	17	83613194	83613894	0.00549541	-0.812	6.0809e-05	0.76283
Otud1	17	86408631	86409725	0.000524807	0.259	3.16558e-06	0.914157
Gpr158	17	88650002	88651952	1.90546e-08	0.39	0.000389673	-0.588862
Gpr158	17	88652851	88653202	0.0186209	-0.373	0.000389673	-0.588862
Ptch1	17	1032241	1032736	0.000616595	0.523	0.0493371	-0.401297
Ptch1	17	1067903	1085885	0.0213796	0.305	0.0493371	-0.401297
Ctsl	17	1877267	1879217	0.017378	0.155	2.13619e-13	1.22748
Ntrk2	17	6243571	6243822	0.00501187	0.236	0.00160617	0.415014
LOC102549506	17	7606255	7606455	0.0194984	1.41	0.0323933	-0.634614
Tmed9	17	9561174	9562683	1.31826e-05	0.231	0.00666031	0.359009
Cdhr2	17	10424932	10425182	0.0112202	0.381	0.000356013	-0.610215
Cplx2	17	10757998	10766061	1.47911e-05	0.262	0.00058884	-0.660988
Syk	17	12616494	12617388	8.91251e-05	0.331	1.38163e-23	2.09763
Syk	17	12626272	12633045	0.0416869	0.213	1.38163e-23	2.09763
Gadd45g	17	13391521	13391907	0.000446684	0.186	1.37755e-15	1.67841
Cks2	17	13593280	13593423	0.030903	0.68	4.84122e-06	1.83708
Ninj1	17	15866331	15866770	0.00245471	0.386	1.95123e-10	1.04435
Fam8a1	17	18415018	18415266	0.0154882	-0.236	0.000469717	-0.484755
Cap2	17	18442357	18442607	0.00524807	-1.2	0.0133875	-0.461744
Tmem170b	17	22832887	22839371	0.042658	0.372	0.011161	-0.62621
Gfod1	17	23823206	23824356	0.0141254	0.108	0.000118502	-0.763722
Bmp6	17	26985068	27112428	0.00630957	0.0998	3.69426e-10	1.29708
Rreb1	17	27541935	27556577	1.44544e-07	0.382	5.16987e-16	1.431
Ly86	17	28147024	28178807	0.0112202	0.315	6.54828e-09	1.63778
Ppp1r3g	17	29567267	29567762	0.00323594	0.517	0.0058187	-0.618933
Ripk1	17	31539613	31540011	0.0102329	0.413	0.00079981	0.748312
RGD1307443	17	42165583	42165932	0.0131826	-0.506	2.19381e-06	-0.887304
RGD1307443	17	42166080	42180624	0.040738	-0.225	2.19381e-06	-0.887304
Elmo1	17	46352101	46352352	0.0389045	-1	0.000575251	-0.506257
Elmo1	17	46352999	46353499	0.0446684	-0.0884	0.000575251	-0.506257
Amph	17	48372569	48444464	0.0371535	0.302	2.61768e-06	-0.881872
LOC100912163	17	53666175	53673734	0.0275423	-1.8	0.00407035	1.0852
Svil	17	55236516	55248670	0.000301995	-0.0455	1.84058e-07	1.04263
Svil	17	55283619	55287609	0.0288403	0.193	1.84058e-07	1.04263
Svil	17	55298213	55304892	0.018197	0.194	1.84058e-07	1.04263
RGD1562037	17	55668153	55668703	0.0131826	-0.39	0.0132672	0.545254
RGD1562037	17	55669002	55669203	0.0245471	-2.04	0.0132672	0.545254
RGD1562037	17	55674292	55676991	1.86209e-05	0.104	0.0132672	0.545254
RGD1562037	17	55677190	55687020	0.0436516	0.164	0.0132672	0.545254
RGD1562037	17	55694864	55695165	0.0158489	0.159	0.0132672	0.545254
Idi1	17	57977942	57980808	0.0102329	0.16	1.32065e-10	-1.39697
Ryr2	17	65555886	65560019	0.00562341	-1.1	1.97154e-09	-1.16499
Klf6	17	67896166	67896416	0.00446684	-0.832	5.20134e-07	1.07973
Klf6	17	67897409	67897759	0.0194984	-0.897	5.20134e-07	1.07973
LOC684327	17	72036537	72036686	0.00338844	0.217	0.0212911	0.34743
Frmd4a	17	77649826	77650174	0.00316228	0.319	0.00248186	0.563672
Frmd4a	17	77652243	77652443	0.0251189	-0.536	0.00248186	0.563672
Dclre1c	17	78782661	78783061	0.0371535	0.448	0.000871224	0.671074
Nmt2	17	78937443	78940156	0.0354813	0.206	0.0469123	-0.353437
Nmt2	17	78941749	78962461	4.67735e-06	0.563	0.0469123	-0.353437
Dnajc1	17	84987042	85037086	1.28825e-05	0.403	0.000762655	0.693441
Enkur	17	88071889	88084527	0.00501187	0.428	0.0139706	0.653452
Apbb1ip	17	90115163	90129948	0.0040738	0.565	8.92196e-11	1.37406
Gng4	17	90266920	90267570	0.0112202	-0.0802	2.25557e-08	-0.887514
Colec12	18	867047	1005116	0.00346737	0.656	8.20963e-10	1.48796
Colec12	18	1025537	1034312	0.000630957	0.107	8.20963e-10	1.48796
Colec12	18	1034411	1034711	0.0380189	0.14	8.20963e-10	1.48796
Ttc39c	18	4042695	4042846	0.00891251	-0.481	0.0138574	-0.402395
Impact	18	4334694	4338533	0.000354813	0.385	4.10468e-05	-0.724808
Fhod3	18	17218601	17300298	7.94328e-08	0.362	0.000176634	-0.680674
Pik3c3	18	23043678	23047846	0.00933254	0.436	0.0274578	-0.319146
Ammecr1l	18	24560538	24562232	0.0128825	0.175	0.0465477	0.331056
Ammecr1l	18	24562928	24563128	0.00501187	-0.914	0.0465477	0.331056
Bin1	18	25163623	25198460	5.24807e-06	0.26	0.00567981	-0.449441
Bin1	18	25199525	25206142	5.01187e-05	0.254	0.00567981	-0.449441
Bin1	18	25206384	25211015	2.18776e-06	0.162	0.00567981	-0.449441
Bin1	18	25221743	25221892	0.0138038	0.128	0.00567981	-0.449441
Reep2	18	27640711	27640859	0.0229087	0.271	0.000111548	-0.706068
Ctnna1	18	27978326	27981858	0.0123027	0.252	5.00845e-05	0.544722
Ctnna1	18	27984721	28026914	0.025704	0.103	5.00845e-05	0.544722
Ctnna1	18	28052331	28052607	0.00851138	0.14	5.00845e-05	0.544722
Igip	18	29116647	29116798	0.0295121	-1.26	0.0256169	-0.556912
Igip	18	29117695	29118245	0.00112202	-0.748	0.0256169	-0.556912
Igip	18	29118394	29118894	0.000186209	-0.987	0.0256169	-0.556912
Igip	18	29119092	29119443	0.00776247	-1.24	0.0256169	-0.556912
Igip	18	29121139	29121539	0.000158489	-0.996	0.0256169	-0.556912
Igip	18	29123584	29123984	0.00158489	-1.97	0.0256169	-0.556912
Igip	18	29124083	29124483	0.00467735	-1.55	0.0256169	-0.556912
Pcdha4	18	30173564	30174864	0.0323594	-0.0466	6.94421e-07	-0.740073
Pcdha4	18	30214401	30214602	0.0158489	-0.259	6.94421e-07	-0.740073
Pcdhgc3	18	30954551	30955196	0.00123027	0.249	0.000340889	0.526688
Pcdhgc3	18	30956037	30964439	2.69153e-05	0.254	0.000340889	0.526688
Pcdhgc3	18	30969230	30969380	0.00120226	0.191	0.000340889	0.526688
Pcdhgc5	18	30969192	30969388	0.000123027	0.199	0	0
Rell2	18	31095113	31095723	0.000389045	0.335	6.69045e-05	-0.929611
Rell2	18	31097145	31097739	0.00562341	0.202	6.69045e-05	-0.929611
Fgf1	18	32351686	32356648	0.030903	0.157	0.00081306	-0.528702
Fgf1	18	32359134	32359433	0.0251189	0.187	0.00081306	-0.528702
Tnfaip8	18	44779664	44779864	0.0234423	-1.18	0.00484817	0.548727
Snx2	18	48142993	48162157	0.00060256	0.0434	0.00977363	0.437602
Gramd3	18	51523757	51564509	2.51189e-05	0.311	0.0427592	0.292633
Megf10	18	52216199	52260183	0.0125893	0.549	0.0433353	-0.27384
Megf10	18	52363469	52364467	0.000218776	-0.151	0.0433353	-0.27384
Megf10	18	52364715	52364966	0.011749	-1.21	0.0433353	-0.27384
Megf10	18	52365164	52365464	0.000549541	-1.53	0.0433353	-0.27384
Megf10	18	52365563	52365863	0.00933254	-0.735	0.0433353	-0.27384
LOC100910979	18	55464179	55464624	0.00316228	0.269	6.85065e-06	1.95837
Csf1r	18	56457372	56457655	0.01	0.127	5.93243e-30	1.85159
Napg	18	58342624	58342925	0.00204174	-0.842	5.49311e-05	-0.596119
Wdr7	18	59394112	59394663	0.00457088	-0.0288	0.000119215	-0.606536
Wdr7	18	59395062	59395762	0.000660693	-0.657	0.000119215	-0.606536
St8sia3	18	59752770	59753065	0.0263027	-0.5	1.29249e-05	-1.02318
St8sia3	18	59754766	59755257	0.000630957	-0.601	1.29249e-05	-1.02318
Gnal	18	62852342	62930860	0.0416869	0.159	8.03679e-05	-0.742131
Chmp1b	18	62923669	62924811	2.81838e-10	0.231	0.0340743	0.295037
Chmp1b	18	62925058	62925207	0.0295121	-0.712	0.0340743	0.295037
LOC100911798	18	63567750	63567901	0.00346737	-1.39	0.0373193	0.35314
Ldlrad4	18	63786204	63844187	4.36516e-05	0.65	0.00526224	0.457821
Rnmt	18	64104864	64105014	0.0316228	-1.08	0.0286641	-0.33062
Rnmt	18	64106455	64106953	0.00114815	-0.624	0.0286641	-0.33062
Mbd2	18	65881399	65884770	0.042658	0.224	0.0189771	0.367106
Mex3c	18	69570895	69571094	0.000467735	-2.14	0.00838103	0.519867
Acaa2	18	70748245	70752364	0.000125893	0.243	0.000343921	0.542765
Pard6g	18	76627093	76627843	0.047863	0.168	9.75405e-07	1.11422
Mbp	18	79406416	79406566	1.07152e-05	0.283	4.69482e-07	-0.764403
Zfp516	18	79841814	79854363	0.00398107	0.355	0.00183439	0.522106
F8	18	382071	382570	8.70964e-07	0.862	0.0153989	0.534651
F8	18	382669	382819	0.0398107	0.666	0.0153989	0.534651
Ankrd29	18	3674013	3674557	0.00891251	-0.475	6.00839e-05	-0.767065
Ankrd29	18	3675643	3675792	0.040738	-0.88	6.00839e-05	-0.767065
Osbpl1a	18	4097010	4097761	0.000389045	0.323	0.0159774	-0.323017
Osbpl1a	18	4164070	4228723	0.0416869	0.191	0.0159774	-0.323017
Ss18	18	6034803	6047350	0.000660693	0.394	6.30005e-05	0.594422
Aqp4	18	6769898	6770248	0.0162181	0.272	0.0111145	0.35256
Aqp4	18	6779085	6781789	0.0354813	0.135	0.0111145	0.35256
Chst9	18	6834797	6865151	0.0158489	0.0422	0.000126261	1.15538
Rprd1a	18	16452898	16453048	0.0295121	-1.03	0.0439611	-0.324509
Rprd1a	18	16453296	16471109	0.018197	0.376	0.0439611	-0.324509
Slc39a6	18	16541478	16541827	8.70964e-05	0.184	0.00268471	0.452306
Celf4	18	17690617	17690766	0.000549541	0.416	0.000368658	-0.714494
Syt4	18	24173871	24174468	3.01995e-05	-0.97	0.00166753	-0.489199
Syt4	18	24178335	24178783	0.017378	0.243	0.00166753	-0.489199
Slc25a46	18	24369449	24369895	0.00588844	-0.4	0.0377447	-0.37838
Slc25a46	18	24369993	24371279	0.00389045	-0.0593	0.0377447	-0.37838
Gypc	18	25313181	25314177	2.88403e-06	0.532	6.91044e-07	1.03755
Stard4	18	25986152	25989480	0.0301995	-0.245	1.96076e-06	-0.98863
Epb41l4a	18	26584232	26639291	0.00389045	0.447	0.000954712	-0.599816
Fam13b	18	27223939	27224089	0.0234423	-0.819	0.00983696	-0.365172
Hbegf	18	29330651	29331482	0.0389045	-0.143	0.00111204	0.709696
Cd14	18	29560389	29560732	0.0398107	0.331	3.32602e-21	2.11179
Cd14	18	29561898	29562046	0.01	0.674	3.32602e-21	2.11179
Arap3	18	31112332	31112782	0.0354813	0.351	0.034092	0.347703
Arap3	18	31112881	31113565	0.00562341	-0.675	0.034092	0.347703
Arhgap26	18	31807201	31807401	0.0134896	-1.86	0.000805585	-0.580895
Arhgap26	18	31807949	31808449	0.0186209	-0.403	0.000805585	-0.580895
Ppp2r2b	18	37086287	37096061	0.0275423	0.362	1.24548e-05	-0.664446
Dpysl3	18	37724956	37738217	0.0263027	0.0102	0.00362383	0.478707
Trim36	18	40081325	40081624	0.0389045	-1.1	0.00186753	-0.474966
Ticam2	18	40556701	40556902	0.017378	0.805	1.18719e-07	1.91308
Ticam2	18	40557151	40569585	1.69824e-06	0.672	1.18719e-07	1.91308
Smim3	18	55745058	55745958	0.00147911	0.291	0.00171999	0.665161
Synpo	18	55871470	55871771	0.0204174	0.361	0.000770212	0.619957
Synpo	18	55872519	55872819	0.00537032	0.72	0.000770212	0.619957
Synpo	18	55897252	55897452	0.0144544	1.11	0.000770212	0.619957
Slc6a7	18	56306063	56307208	0.0218776	0.0651	5.17668e-07	-0.983629
Slc26a2	18	56520443	56521291	0.000218776	0.532	0.00330573	0.883293
Pcyox1l	18	57021278	57021624	0.0389045	0.494	0.0255967	-0.329021
Adrb2	18	57514239	57514738	0.0288403	0.242	3.0588e-10	1.62642
Nars	18	59994453	60002544	0.000251189	0.472	0.00478701	-0.434113
Lman1	18	61689887	61696053	0.00042658	0.384	0.000819087	0.519071
Mc4r	18	62613929	62614278	0.0169824	0.937	0.00937558	-0.99078
Ptpn2	18	63422660	63427700	0.00162181	0.554	0.00023098	0.790773
Rab27b	18	68488774	68494011	0.0380189	0.145	0.0497412	-0.494774
Smad4	18	69626681	69627182	0.000389045	-1.55	0.0199498	0.45318
Rnf165	18	73831776	73832021	0.0018197	-0.908	0.0450499	-0.769148
RGD1308601	18	74013263	74013563	0.0218776	-1.36	0.00122139	-0.535684
RGD1308601	18	74016701	74037448	0.0177828	0.433	0.00122139	-0.535684
RGD1308601	18	74058720	74059020	0.000158489	0.56	0.00122139	-0.535684
Slc14a1	18	74461063	74461808	0.0128825	0.311	1.29584e-12	0.956157
Slc14a1	18	74462898	74463247	0.00512861	0.168	1.29584e-12	0.956157
Slc14a1	18	74478250	74481967	0.042658	0.22	1.29584e-12	0.956157
Nfatc1	18	77204260	77204806	3.63078e-05	0.819	6.18924e-07	1.11551
Cndp2	18	81532684	81538896	0.0120226	0.178	1.57583e-07	0.743822
Socs6	18	85963665	85965392	0.00204174	0.164	8.90062e-10	1.36324
Dync1li2	19	757600	760764	0.0229087	0.171	0.00952759	-0.382393
Cdh11	19	2548595	2549646	0.0457088	0.202	0.000113431	1.01442
Ccdc102a	19	10523416	10535112	1.20226e-06	0.422	0.0311948	0.395127
Bbs2	19	11406424	11407652	2.5704e-05	0.324	0.00281919	-0.417163
Bbs2	19	11415709	11421423	0.0186209	0.392	0.00281919	-0.417163
Snx20	19	19404351	19404797	0.00040738	0.522	3.56015e-10	1.45486
Cbln1	19	20609371	20609820	0.0204174	0.201	3.64595e-07	-1.1179
Sall1	19	23399940	23400140	0.0204174	-0.439	0.00172923	0.427618
Sall1	19	23400833	23400983	0.047863	0.286	0.00172923	0.427618
Sall1	19	23403535	23404231	0.0186209	0.249	0.00172923	0.427618
Clgn	19	24577976	24578127	0.00512861	-2.2	6.5735e-05	-0.774786
Palm3	19	25150296	25151879	0.0275423	0.35	0.000263875	-0.924525
Lyl1	19	25817393	25817831	0.00371535	0.41	1.69593e-17	1.79809
Dnase2	19	26025084	26025474	0.00812831	0.397	1.07556e-38	2.34561
LOC103694306	19	28361991	28363860	0.0131826	0.0851	1.53365e-18	2.37462
Ednra	19	33990356	33990606	0.0436516	0.508	3.28463e-06	1.40042
Tmem184c	19	34041523	34041721	0.01	0.186	0.0215298	-0.317531
Arhgap10	19	34402448	34402599	0.0151356	0.632	7.9605e-11	1.51513
E2f4	19	37253701	37254191	0.0275423	0.123	0.018605	0.3681
Carmil2	19	37662624	37664327	7.94328e-05	0.157	0.000691936	-0.817301
Carmil2	19	37665183	37665333	0.018197	0.293	0.000691936	-0.817301
Pard6a	19	37669702	37670101	5.01187e-05	0.55	1.98302e-05	-0.979661
Atmin	19	49496734	49497135	0.000912011	0.525	4.41807e-05	-0.782295
Atmin	19	49497383	49497584	0.000363078	-1.57	4.41807e-05	-0.782295
Atmin	19	49497783	49498184	0.001	-1.53	4.41807e-05	-0.782295
Gan	19	49741182	49741583	0.047863	0.584	0.0291037	-0.48464
Cdh13	19	51842745	51885574	0.0489779	0.178	0.0198451	-0.373607
Cdh13	19	51970974	51971272	0.00549541	0.187	0.0198451	-0.373607
Necab2	19	52105851	52108928	0.00707946	0.22	5.87181e-05	-0.823393
Crispld2	19	52703928	52704177	0.0239883	-0.721	3.85523e-05	0.710964
RGD1304884	19	53729862	53738788	0.000630957	0.164	0.000560175	-0.650898
RGD1304884	19	53739636	53739887	0.0017378	0.386	0.000560175	-0.650898
RGD1304884	19	53741634	53741884	0.0025704	0.358	0.000560175	-0.650898
Map1lc3b	19	53635646	53641849	8.51138e-06	0.284	0.0163938	-0.322585
Map1lc3b	19	53642681	53642880	0.025704	-0.239	0.0163938	-0.322585
Jph3	19	54607106	54607304	0.000104713	0.284	0.00109796	-0.680413
Jph3	19	54607402	54607551	4.57088e-05	0.426	0.00109796	-0.680413
Ctu2	19	55305274	55305493	0.0389045	0.339	0.0115955	0.437865
Spata33	19	56010131	56022424	2.18776e-06	0.482	0.000428208	-0.674977
Spire2	19	56158022	56160636	0.00977237	0.406	0.000164059	-0.961187
Tcf25	19	56179301	56189790	0.000588844	0.344	0.0166459	-0.360647
Tubb3	19	56228393	56228687	0.000234423	0.167	0.0112287	-0.495952
Tubb3	19	56229274	56229617	7.24436e-05	0.241	0.0112287	-0.495952
Gas8	19	56322943	56325564	0.00794328	0.545	0.0233552	-0.463618
Galnt2	19	57114023	57114173	0.00186209	0.355	0.0193514	0.331466
Tsnax	19	57781189	57784189	0.000128825	0.155	0.00218214	-0.415331
Kcnk1	19	58862331	58862629	0.0123027	-0.746	3.24315e-05	-0.858884
Itgb1	19	61677511	61677710	1.44544e-06	0.489	0.00110084	0.666934
Pdp2	19	597915	599042	4.57088e-05	0.433	0.0341797	-0.423484
Ndrg4	19	9767586	9767836	5.7544e-05	0.208	1.13649e-05	-0.810844
Large1	19	12481562	12482857	0.047863	0.18	0.0069122	-0.471065
Nkd1	19	19437013	19439999	0.00011749	0.13	0.00504278	-0.507897
Adcy7	19	19704405	19704556	8.51138e-05	0.397	9.04996e-05	0.682321
Pkn1	19	24818350	24822435	0.0346737	-0.183	0.000213096	0.563843
Calr	19	25957162	25959440	0.00338844	0.337	9.41939e-05	0.578695
MAST1	19	26026143	26026838	0.0018197	0.206	3.57014e-06	-0.978616
Junb	19	26093268	26093715	7.76247e-05	0.206	2.98093e-08	1.08169
Junb	19	26093913	26094310	0.0131826	0.219	2.98093e-08	1.08169
Junb	19	26094408	26094706	0.00416869	0.0588	2.98093e-08	1.08169
Nr3c2	19	34752135	34752483	0.0104713	-0.535	0.0148142	-0.374449
B3gnt9	19	37209903	37210253	0.0245471	0.411	0.00199324	0.703937
Tradd	19	37214559	37214855	0.00190546	0.212	0.000604392	0.635159
Fhod1	19	37303606	37303855	0.0218776	0.464	4.55714e-16	1.43569
Slc12a4	19	37917002	37917403	0.00316228	0.458	2.64598e-05	0.681636
Zfp612	19	41558455	41559006	0.00724436	-0.356	1.84002e-05	-0.859697
Maf	19	48182524	48182675	0.000151356	1.18	2.19585e-10	1.09788
Maf	19	48193505	48195296	0.0338844	-0.274	2.19585e-10	1.09788
Maf	19	48195495	48195846	9.77237e-09	0.284	2.19585e-10	1.09788
Maf	19	48196195	48196346	0.00831764	0.231	2.19585e-10	1.09788
Maf	19	48196445	48197546	3.0903e-07	0.478	2.19585e-10	1.09788
Sdr42e1	19	50209848	50210147	0.020893	0.834	0.00266487	-0.715339
Kcng4	19	52271848	52272989	0.0323594	0.205	0.000634223	-0.700509
Cotl1	19	52466102	52480912	0.000354813	0.155	2.40822e-09	0.899245
Fbxo31	19	53489382	53489532	0.0138038	0.256	0.0178006	-0.440977
Piezo1	19	55305693	55305943	0.000630957	0.558	1.10457e-16	1.48409
Piezo1	19	55310087	55311008	0.000933254	0.423	1.10457e-16	1.48409
Dbndd1	19	56303495	56303842	0.00436516	0.424	0.00036447	-0.812116
Pgbd5	19	57127055	57127703	7.24436e-08	0.527	1.97794e-05	-0.8954
Ttc13	19	57442678	57445272	0.00141254	-0.644	7.52248e-07	0.763053
Irf2bp2	19	59499696	59501456	0.000363078	0.11	0.000102498	0.565894
Erap1	2	1438729	1445192	0.00977237	-0.227	5.73549e-07	1.11879
Mblac2	2	9578695	9578892	0.0134896	0.464	0.0127152	-0.542158
Hapln1	2	18416945	18417094	0.000245471	-4.29	1.79868e-09	-1.52359
Hapln1	2	18417886	18418135	0.0380189	-0.885	1.79868e-09	-1.52359
Ssbp2	2	20664215	20669188	0.00537032	0.109	0.00274709	-0.438253
Ankrd34b	2	22016515	22016665	0.00549541	-0.846	1.90382e-08	-1.13108
Mtx3	2	22436478	22436628	0.0288403	-0.856	0.000113649	-0.75985
Mtx3	2	22436727	22437126	4.7863e-05	-0.997	0.000113649	-0.75985
Mtx3	2	22439168	22439567	0.0020893	-0.744	0.000113649	-0.75985
Lhfpl2	2	23827151	23827601	6.45654e-05	0.332	1.27121e-15	1.33409
Lhfpl2	2	23850223	23850374	0.047863	0.298	1.27121e-15	1.33409
Lhfpl2	2	23850523	23851173	0.0114815	-0.128	1.27121e-15	1.33409
Ap3b1	2	24083736	24107534	0.00524807	0.444	0.0254437	0.363989
Zbed3	2	25041196	25050630	0.0112202	0.148	4.34175e-05	0.724951
Zbed3	2	25051478	25051679	0.0446684	0.56	4.34175e-05	0.724951
Fam169a	2	27939073	27939224	0.0223872	-1.5	0.000235578	-0.633724
Foxd1	2	28460808	28461155	0.000851138	0.473	8.15056e-16	1.87813
Mrps27	2	29665911	29666461	0.0162181	0.256	0.00722938	-0.490938
Cd180	2	32828958	32832024	0.000138038	0.212	1.20778e-12	1.96834
Sgtb	2	34219291	34219740	0.0223872	-0.132	2.00392e-07	-0.804377
Ercc8	2	39470904	39471054	0.0251189	-1.04	0.0155046	-0.387595
Pde4d	2	41286332	41418614	0.0275423	-0.67	0.000361593	-0.627031
Pde4d	2	41463116	41464362	0.0120226	0.501	0.000361593	-0.627031
Pde4d	2	41464810	41464961	0.0331131	-3.21	0.000361593	-0.627031
Pde4d	2	41466456	41467254	0.0074131	-0.48	0.000361593	-0.627031
Plk2	2	41912180	41912993	0.0169824	0.416	0.00570267	0.468796
Il6st	2	44279248	44279486	0.00812831	0.156	0.00247494	0.492736
Il6st	2	44314349	44315694	1.44544e-06	0.277	0.00247494	0.492736
Il6st	2	44316439	44316640	0.0120226	0.257	0.00247494	0.492736
Il6st	2	44317783	44318481	0.00316228	-0.239	0.00247494	0.492736
Il6st	2	44318829	44318979	0.00467735	-1.45	0.00247494	0.492736
Hcn1	2	50155404	50155603	0.0316228	-0.795	0.000155208	-0.950109
Hcn1	2	50498861	50499750	0.000251189	-0.394	0.000155208	-0.950109
C6	2	54527960	54533701	0.0177828	0.285	1.31086e-22	2.92391
Prkaa1	2	54891216	54891714	0.0144544	-1.27	0.0123648	-0.468858
Prkaa1	2	54892458	54892857	0.030903	-1.33	0.0123648	-0.468858
Prkaa1	2	54892956	54893155	0.00645654	-1.91	0.0123648	-0.468858
Ttc33	2	54897518	54903020	0.00363078	0.439	0.000659735	-0.705387
Ttc33	2	54939810	54940508	6.16595e-07	-0.815	0.000659735	-0.705387
Fyb	2	55881326	55884250	0.0123027	0.722	1.02794e-17	2.15495
Fyb	2	55944904	55949794	0.0109648	0.385	1.02794e-17	2.15495
Fyb	2	55954573	55962751	0.0436516	0.206	1.02794e-17	2.15495
Adamts12	2	61293305	61293605	0.0301995	0.442	1.75562e-12	1.94906
Cdh10	2	69635851	69636500	0.0190546	0.598	0.0106632	-0.419252
Dap	2	84276082	84328004	0.00588844	0.11	5.1953e-14	1.64413
Sema5a	2	85806923	85807174	0.00707946	0.0954	0.0253911	-0.459216
Snx16	2	93518992	93523299	0.0154882	0.331	0.0321815	-0.402139
Pmp2	2	93827503	93830572	4.46684e-05	0.215	0.000105721	-0.850371
Nceh1	2	112931236	112932276	0.00120226	0.198	0.0273208	-0.367916
Pld1	2	113744348	113763651	0.000416869	0.292	0.00132049	0.609482
Pld1	2	113848308	113848507	0.0165959	-0.845	0.00132049	0.609482
Tnik	2	114290107	114324154	0.00204174	0.382	0.0469749	-0.284414
Tnik	2	114384613	114386062	0.00933254	-0.0536	0.0469749	-0.284414
Tnik	2	114386360	114386611	0.0467735	-0.484	0.0469749	-0.284414
Eif5a2	2	115349930	115350080	0.00616595	-0.546	1.04856e-07	-0.867261
Eif5a2	2	115350774	115351024	0.000501187	-1.13	1.04856e-07	-0.867261
Eif5a2	2	115351669	115352017	0.00645654	-1.36	1.04856e-07	-0.867261
Eif5a2	2	115353109	115353458	0.000389045	-1.65	1.04856e-07	-0.867261
Usp13	2	119258078	119259842	0.0380189	-0.432	0.0012853	-0.609394
Usp13	2	119314012	119314163	0.00707946	-0.915	0.0012853	-0.609394
Usp13	2	119316807	119317008	0.0263027	0.558	0.0012853	-0.609394
Usp13	2	119317306	119317457	0.0186209	-1.44	0.0012853	-0.609394
Arse	2	122876694	122877293	0.0154882	0.433	0.0142705	0.393599
Hspa4l	2	127634649	127642646	0.00660693	0.272	1.4221e-05	-0.790834
Hspa4l	2	127656683	127676538	0.00234423	0.288	1.4221e-05	-0.790834
Hspa4l	2	127680771	127681569	0.00131826	-0.238	1.4221e-05	-0.790834
Hspa4l	2	127682365	127682814	0.00457088	-1.28	1.4221e-05	-0.790834
Noct	2	140306425	140306672	0.0229087	-0.767	0.00196565	-0.631405
[truncated: 2,199 more rows]
